# Supplementary material for: Continuous video capture, and pollinia tracking, in Platanthera (Orchidaceae) reveal new insect visitors and potential pollinators
Source: PeerJ. 2022 May 9;10:e13191. doi: 10.7717/peerj.13191 (PMC9097665; doi:10.7717/peerj.13191)
Supplement: Supplemental Information 2 [file peerj-10-13191-s002.xlsx]

## Sheet: Video Data
Date	Site	Start time	End time	Class	Order	Family	Sub fam	Genus	Sp	Behaviour	Species of plant(s) visited	Pollinia visible	Time Category
21-7-2020	S1	14:53:54	14:54:20	Insecta	Diptera					Fly by			12:01-18:00
21-7-2020	S1	14:58:56	14:59:06	Insecta						Fly by			12:01-18:00
21-7-2020	S1	15:04:00	15:04:12	Insecta						Fly by			12:01-18:00
21-7-2020	S1	15:04:20	15:04:35	Insecta						Fly by			12:01-18:00
21-7-2020	S1	15:05:09	15:05:19	Insecta	Diptera	Syrphidae				Fly by			12:01-18:00
21-7-2020	S1	15:17:00	15:17:14	Insecta						Fly by			12:01-18:00
21-7-2020	S1	15:29:23	15:29:41	Insecta	Diptera	Syrphidae	Syrphinae			Hovering	P. dilatata		12:01-18:00
21-7-2020	S1	15:33:39	15:33:51	Insecta						Fly by		N	12:01-18:00
21-7-2020	S1	15:33:23	15:33:35	Insecta	Diptera	Syrphidae				Fly by			12:01-18:00
21-7-2020	S1	15:40:22	15:40:37	Insecta						Fly by			12:01-18:00
21-7-2020	S1	15:42:02	15:42:21	Insecta	Diptera	Syrphidae	Syrphinae			Landed on flower	P. dilatata		12:01-18:00
21-7-2020	S1	15:43:09	15:43:19	Insecta	Diptera	Syrphidae				Fly by			12:01-18:00
21-7-2020	S1	15:43:35	15:43:46	Insecta	Diptera	Syrphidae	Syrphinae			Hovering	P. dilatata		12:01-18:00
21-7-2020	S1	15:50:09	15:50:20	Insecta	Diptera	Syrphidae	Syrphinae			Active on flower	P. dilatata		12:01-18:00
21-7-2020	S1	16:16:47	16:16:59	Insecta	Diptera	Syrphidae				Fly by			12:01-18:00
21-7-2020	S1	16:30:16	16:30:27	Insecta	Diptera	Syrphidae				Fly by			12:01-18:00
21-7-2020	S1	16:30:16	16:30:27	Insecta						On flower	P. dilatata		12:01-18:00
21-7-2020	S1	16:46:15	16:46:27	Insecta	Diptera	Syrphidae	Syrphinae			Active on flower	P. dilatata		12:01-18:00
21-7-2020	S1	16:46:36	16:46:48	Insecta	Diptera	Syrphidae	Syrphinae			Active on flower	P. dilatata		12:01-18:00
21-7-2020	S1	16:46:54	16:47:06	Insecta	Diptera	Syrphidae	Syrphinae			Active on flower	P. dilatata		12:01-18:00
21-7-2020	S1	17:11:01	17:11:13	Insecta						Other			12:01-18:00
21-7-2020	S1	17:28:31	17:29:06	Insecta						On flower	P. stricta		12:01-18:00
21-7-2020	S1	17:29:13	17:29:34	Insecta						On flower	P. stricta		12:01-18:00
21-7-2020	S1	17:35:38	17:35:51	Insecta	Diptera	Syrphidae	Syrphinae			Landed on flower	P. dilatata		12:01-18:00
21-7-2020	S1	18:02:34	18:03:02	Insecta						Fly by			18:01-24:00
21-7-2020	S1	18:05:37	18:05:53	Insecta						Fly by			18:01-24:00
21-7-2020	S1	18:16:48	18:17:02	Insecta						Fly by			18:01-24:00
21-7-2020	S1	18:29:06	18:29:19	Insecta	Diptera	Syrphidae				Fly by			18:01-24:00
21-7-2020	S1	18:30:42	18:30:52	Insecta						Fly by			18:01-24:00
21-7-2020	S1	18:32:35	18:32:46	Insecta						Fly by			18:01-24:00
21-7-2020	S1	18:52:19	18:52:31	Insecta	Diptera					Landed on flower	P. dilatata		18:01-24:00
21-7-2020	S1	19:14:12	19:14:24	Insecta						Fly by			18:01-24:00
21-7-2020	S1	19:14:25	19:14:58	Insecta						Fly by			18:01-24:00
21-7-2020	S1	19:37:34	19:37:59	Insecta						Fly by			18:01-24:00
21-7-2020	S1	19:39:46	19:40:00	Insecta						On flower	P. stricta		18:01-24:00
21-7-2020	S1	19:48:05	19:48:17	Insecta						On flower	P. stricta		18:01-24:00
21-7-2020	S1	19:48:20	19:48:30	Insecta						On flower	P. stricta		18:01-24:00
21-7-2020	S1	20:05:34	20:05:44	Insecta						Fly by			18:01-24:00
21-7-2020	S1	20:13:34	20:13:45	Insecta	Coleoptea	Staphylinidae				Landed on flower	P. dilatata		18:01-24:00
21-7-2020	S1	20:25:48	20:25:59	Insecta						Fly by			18:01-24:00
21-7-2020	S1	20:26:44	20:26:56	Insecta						Fly by			18:01-24:00
21-7-2020	S1	20:35:50	20:36:05	Insecta						Fly by			18:01-24:00
21-7-2020	S1	20:35:53	20:36:04	Insecta						Landed on flower	P. dilatata		18:01-24:00
21-7-2020	S1	20:38:21	20:38:32	Insecta						Fly by			18:01-24:00
21-7-2020	S1	20:38:21	20:38:32	Insecta						On flower	P. dilatata		18:01-24:00
21-7-2020	S1	20:40:10	20:40:22	Insecta						Fly by			18:01-24:00
21-7-2020	S1	20:41:15	20:41:33	Insecta						Flew off plant	P. dilatata		18:01-24:00
22-7-2020	S1	10:05:42	10:05:53	Insecta	Hymenoptera	Apidae		Bombus		Fly by			06:01-12:00
22-7-2020	S1	12:25:47	12:26:07	Insecta	Hymenoptera	Apidae		Bombus		Fly by			12:01-18:00
22-7-2020	S1	21:02:30	21:02:43	Insecta						Fly by			18:01-24:00
22-7-2020	S1	21:11:15	21:11:25	Insecta	Diptera					Fly by			18:01-24:00
22-7-2020	S1	21:12:30	21:12:45	Insecta						Fly by			18:01-24:00
22-7-2020	S1	21:12:38	21:12:48	Insecta						Fly by			18:01-24:00
22-7-2020	S1	21:13:40	21:13:51	Insecta						Fly by			18:01-24:00
22-7-2020	S1	21:15:10	21:15:21	Insecta						Fly by			18:01-24:00
22-7-2020	S1	21:16:20	21:16:31	Insecta						Fly by			18:01-24:00
22-7-2020	S1	22:25:41	22:25:54	Insecta	Lepidoptera					Other			18:01-24:00
22-7-2020	S1	22:26:30	22:26:41	Insecta	Lepidoptera					Other			18:01-24:00
22-7-2020	S1	22:27:00	22:27:17	Insecta	Lepidoptera					Other			18:01-24:00
22-7-2020	S1	22:28:02	22:28:16	Insecta	Lepidoptera					Other			18:01-24:00
22-7-2020	S1	22:28:17	22:28:36	Insecta	Lepidoptera					Other			18:01-24:00
22-7-2020	S1	22:29:38	22:29:58	Insecta	Lepidoptera					Other			18:01-24:00
22-7-2020	S1	22:30:06	22:30:18	Insecta	Lepidoptera					Other			18:01-24:00
22-7-2020	S1	22:32:27	22:32:49	Insecta	Lepidoptera					Other			18:01-24:00
22-7-2020	S1	22:32:53	22:33:05	Insecta	Lepidoptera					Other			18:01-24:00
22-7-2020	S1	23:45:58	23:46:09	Insecta	Diptera					Other			18:01-24:00
22-7-2020	S1	00:16:58	00:17:08	Insecta	Lepidoptera					Other			00:01-06:00
22-7-2020	S1	00:34:40	00:34:55	Insecta	Lepidoptera					Other			00:01-06:00
22-7-2020	S1	00:35:05	00:35:19	Insecta	Lepidoptera					Other			00:01-06:00
22-7-2020	S1	00:35:23	00:35:37	Insecta	Lepidoptera					Other			00:01-06:00
22-7-2020	S1	00:35:35	00:35:52	Insecta	Lepidoptera					Other			00:01-06:00
22-7-2020	S1	01:10:26	01:10:51	Insecta	Lepidoptera					Other			00:01-06:00
22-7-2020	S1	01:11:09	01:11:21	Insecta	Lepidoptera					Other			00:01-06:00
22-7-2020	S1	01:11:31	01:11:44	Insecta	Lepidoptera					Other			00:01-06:00
22-7-2020	S1	01:13:16	01:13:38	Insecta	Lepidoptera					Other			00:01-06:00
22-7-2020	S1	01:13:43	01:13:59	Insecta	Lepidoptera					Other			00:01-06:00
22-7-2020	S1	09:46:15	09:46:31	Insecta						Other			06:01-12:00
22-7-2020	S1	10:05:28	10:05:41	Insecta	Diptera	Tipulidae				Landed on plant	P. dilatata		06:01-12:00
22-7-2020	S1	10:19:13	10:19:33	Insecta						Other	P. stricta		06:01-12:00
22-7-2020	S1	10:25:15	10:25:29	Insecta	Diptera	Syrphidae				Fly by			06:01-12:00
22-7-2020	S1	10:55:20	10:55:30	Insecta	Diptera	Syrphidae				Fly by			06:01-12:00
22-7-2020	S1	10:56:08	10:56:21	Insecta	Diptera	Syrphidae				Fly by			06:01-12:00
22-7-2020	S1	12:04:48	12:05:06	Insecta	Diptera	Syrphidae	Syrphinae			Active on flower	P. stricta		12:01-18:00
22-7-2020	S1	12:54:22	12:54:34	Insecta	Diptera	Syrphidae				Fly by			12:01-18:00
22-7-2020	S1	12:58:24	12:58:34	Insecta						Fly by			12:01-18:00
22-7-2020	S1	13:38:05	13:38:13	Insecta	Diptera	Syrphidae	Syrphinae			Active on flower	P. dilatata		12:01-18:00
22-7-2020	S1	14:23:54	14:24:07	Insecta	Diptera					Other			12:01-18:00
22-7-2020	S1	15:11:35	15:11:47	Insecta						Fly by			12:01-18:00
22-7-2020	S1	15:25:50	15:26:00	Insecta						Fly by			12:01-18:00
22-7-2020	S1	15:26:30	15:26:46	Insecta	Diptera					Other			12:01-18:00
22-7-2020	S1	16:06:10	16:06:30	Insecta	Diptera					Other			12:01-18:00
22-7-2020	S1	16:06:52	16:07:04	Insecta	Diptera					Other			12:01-18:00
22-7-2020	S1	16:09:01	16:09:13	Insecta	Diptera					Other			12:01-18:00
22-7-2020	S1	16:24:15	16:24:26	Insecta	Diptera					Other			12:01-18:00
22-7-2020	S1	16:38:04	16:38:15	Insecta	Diptera					Other			12:01-18:00
22-7-2020	S1	16:39:21	16:39:32	Insecta	Diptera					Other			12:01-18:00
22-7-2020	S1	17:50:41	17:50:52	Insecta						Fly by			12:01-18:00
22-7-2020	S1	17:55:22	17:55:35	Insecta						Fly by			12:01-18:00
22-7-2020	S1	18:01:46	18:01:58	Insecta						Fly by			18:01-24:00
22-7-2020	S1	18:10:16	18:10:32	Insecta	Diptera					Fly by			18:01-24:00
22-7-2020	S1	18:16:06	18:16:17	Insecta	Diptera					Fly by			18:01-24:00
22-7-2020	S1	19:08:50	19:09:01	Insecta	Diptera					Fly by			18:01-24:00
22-7-2020	S1	19:13:38	19:13:51	Insecta	Diptera					Fly by			18:01-24:00
22-7-2020	S1	19:34:13	19:34:31	Insecta	Diptera					Fly by			18:01-24:00
22-7-2020	S1	19:40:35	19:40:47	Insecta	Diptera					Fly by			18:01-24:00
22-7-2020	S1	20:01:32	20:01:50	Insecta						Fly by			18:01-24:00
22-7-2020	S1	20:18:20	20:18:36	Arachnida						Other			18:01-24:00
23-7-2020	S1	15:17:55	15:18:08	Insecta	Hymenoptera	Apidae		Bombus	flavifrons	Active on flower	P. dilatata	Y	12:01-18:00
23-7-2020	S1	12:58:52	12:59:11	Insecta	Hymenoptera	Apidae		Bombus		Fly by			12:01-18:00
23-7-2020	S1	07:32:30	07:32:41	Insecta						Fly by			06:01-12:00
23-7-2020	S1	08:54:00	08:54:45	UNKN						Other			06:01-12:00
23-7-2020	S1	09:01:35	09:01:47	UNKN						Other			06:01-12:00
23-7-2020	S1	09:06:43	09:06:54	UNKN						Other			06:01-12:00
23-7-2020	S1	09:07:30	09:07:48	UNKN						Other			06:01-12:00
23-7-2020	S1	09:12:46	09:13:31	UNKN						Other			06:01-12:00
23-7-2020	S1	09:14:36	09:15:02	UNKN						Other			06:01-12:00
23-7-2020	S1	09:15:04	09:15:48	UNKN						Other			06:01-12:00
23-7-2020	S1	09:22:44	09:22:56	Insecta	Diptera	Syrphidae				Fly by			06:01-12:00
23-7-2020	S1	10:47:58	10:48:09	Insecta	Diptera	Syrphidae				Fly by			06:01-12:00
23-7-2020	S1	10:58:12	10:58:30	Insecta						On flower	P. stricta		06:01-12:00
23-7-2020	S1	11:02:34	11:02:45	Insecta						On flower	P. dilatata		06:01-12:00
23-7-2020	S1	11:03:47	11:03:59	Insecta	Diptera	Syrphidae				Fly by			06:01-12:00
23-7-2020	S1	12:42:40	12:42:55	Insecta	Diptera	Syrphidae	Syrphinae			Landed on flower	P. dilatata		12:01-18:00
23-7-2020	S1	14:11:58	14:12:08	Insecta	Diptera	Syrphidae				Fly by			12:01-18:00
23-7-2020	S1	14:16:47	14:16:58	Insecta						Fly by			12:01-18:00
23-7-2020	S1	15:37:54	15:38:06	Insecta	Diptera					Fly by			12:01-18:00
23-7-2020	S1	16:05:19	16:05:37	Insecta	Lepidoptera					Other			12:01-18:00
23-7-2020	S1	16:05:41	16:05:58	Insecta	Lepidoptera					Other			12:01-18:00
23-7-2020	S1	16:07:11	16:07:22	Insecta	Lepidoptera					Other			12:01-18:00
23-7-2020	S1	16:11:29	16:11:44	Insecta	Lepidoptera					Other			12:01-18:00
23-7-2020	S1	16:53:52	16:54:04	Insecta						Landed on plant	P. stricta		12:01-18:00
23-7-2020	S1	17:44:45	17:44:56	Insecta						Fly by			12:01-18:00
23-7-2020	S1	17:46:32	17:46:47	Insecta						Fly by			12:01-18:00
23-7-2020	S1	17:55:55	17:56:13	Insecta						Fly by			12:01-18:00
23-7-2020	S1	17:56:17	17:56:28	Insecta						Fly by			12:01-18:00
23-7-2020	S1	19:15:55	19:16:06	Insecta						On plant	P. dilatata		18:01-24:00
23-7-2020	S1	19:40:05	19:40:17	Insecta						Fly by			18:01-24:00
23-7-2020	S1	20:32:58	20:33:09	Insecta						Fly by			18:01-24:00
24-7-2020	S1	14:44:11	14:44:34	Insecta	Diptera	Syrphidae		Lapposyrphus	lapponicus	Active on flower	P. dilatata, P. siticta		12:01-18:00
24-7-2020	S1	16:05:41	16:05:55	Insecta	Hymenoptera	Apidae		Bombus	melanopygus	Landed on flower	P. dilatata		12:01-18:00
24-7-2020	S1	16:48:08	16:48:37	Insecta	Hymenoptera	Apidae		Bombus		Fly by			12:01-18:00
24-7-2020	S1	08:49:57	08:50:22	Arachnida						Other			06:01-12:00
24-7-2020	S1	13:43:45	13:44:00	Insecta	Diptera	Syrphidae	Syrphinae			Active on flower	P. dilatata		12:01-18:00
24-7-2020	S1	13:56:53	13:57:04	Arachnida						Other			12:01-18:00
24-7-2020	S1	13:58:16	13:58:34	Arachnida						Other			12:01-18:00
24-7-2020	S1	13:58:46	13:58:56	Arachnida						Other			12:01-18:00
24-7-2020	S1	14:50:11	14:50:21	Insecta	Diptera	Syrphidae				Flew off plant	P. dilatata		12:01-18:00
24-7-2020	S1	15:02:58	15:03:38	Insecta	Diptera	Syrphidae				Fly by			12:01-18:00
24-7-2020	S1	15:15:56	15:16:12	Insecta	Diptera	Syrphidae	Syrphinae			Hovered near flowers	P. dilatata		12:01-18:00
24-7-2020	S1	15:28:38	15:28:48	Insecta	Diptera	Syrphidae				Fly by			12:01-18:00
24-7-2020	S1	15:52:45	15:52:59	Insecta						Other			12:01-18:00
24-7-2020	S1	15:54:05	15:54:19	Insecta						Other			12:01-18:00
24-7-2020	S1	15:55:11	15:55:19	Insecta						Other			12:01-18:00
24-7-2020	S1	16:27:37	16:27:52	Insecta	Diptera	Syrphidae	Syrphinae			Active on flower	P. dilatata		12:01-18:00
24-7-2020	S1	16:38:07	16:38:29	Insecta	Diptera	Syrphidae	Syrphinae			Landed on flower	P. dilatata		12:01-18:00
24-7-2020	S1	17:02:02	17:02:25	Insecta	Diptera	Syrphidae				Fly by			12:01-18:00
24-7-2020	S1	17:15:28	17:15:38	Insecta						Other			12:01-18:00
24-7-2020	S1	17:42:09	17:42:26	Insecta	Diptera	Syrphidae				Fly by			12:01-18:00
25-7-2020	S1	09:16:56	09:17:09	Insecta	Hymenoptera	Apidae		Bombus		Fly by			06:01-12:00
21-7-2020	S2	11:40:05	11:40:36	Insecta	Hymenoptera	Apidae		Bombus		Fly by			06:01-12:00
21-7-2020	S2	14:51:34	14:51:46	Insecta	Hymenoptera	Apidae		Bombus		Fly by			12:01-18:00
21-7-2020	S2	16:41:40	16:41:55	Insecta	Hymenoptera	Apidae		Bombus		Fly by			12:01-18:00
21-7-2020	S2	14:23:08	14:23:23	Insecta	Diptera	Syrphidae		Eupeodes		Active on flower	P. dilatata		12:01-18:00
21-7-2020	S2	18:20:37	18:20:48	Insecta	Diptera	Syrphidae	Syrphinae			Hovered near flowers	P. dilatata		18:01-24:00
21-7-2020	S2	12:35:22	12:35:34	Insecta	Diptera	Syrphidae	Syrphinae			Hovered near flowers	P. dilatata		12:01-18:00
21-7-2020	S2	13:47:59	13:48:11	Insecta	Diptera	Syrphidae				Fly by			12:01-18:00
21-7-2020	S2	14:08:54	14:09:12	Arachnida						Other			12:01-18:00
21-7-2020	S2	14:10:56	14:11:20	Insecta	Hymenoptera	Formicidae				Other			12:01-18:00
21-7-2020	S2	14:38:02	14:38:13	Arachnida						Other			12:01-18:00
21-7-2020	S2	14:38:59	14:39:10	Arachnida						Other			12:01-18:00
21-7-2020	S2	15:39:32	15:39:45	Insecta	Diptera					On flower	P. dilatata		12:01-18:00
21-7-2020	S2	15:45:25	15:45:35	Insecta						Landed on flower	P. dilatata		12:01-18:00
21-7-2020	S2	15:48:33	15:48:45	Insecta	Diptera					Other			12:01-18:00
21-7-2020	S2	15:56:57	15:57:09	Insecta						Fly by			12:01-18:00
21-7-2020	S2	16:30:59	16:31:11	Insecta	Diptera	Syrphidae				Hovered near flowers	P. dilatata		12:01-18:00
21-7-2020	S2	17:20:03	17:20:15	Arachnida						Other			12:01-18:00
21-7-2020	S2	17:33:44	17:34:03	Arachnida						Other			12:01-18:00
21-7-2020	S2	17:58:38	17:58:49	Insecta						Fly by			12:01-18:00
21-7-2020	S2	18:33:21	18:33:33	Insecta	Diptera					Fly by			18:01-24:00
22-7-2020	S2	10:33:04	10:33:16	Insecta	Hymenoptera	Apidae		Bombus		Fly by			06:01-12:00
22-7-2020	S2	11:05:58	11:06:10	Insecta	Hymenoptera	Apidae		Bombus		Fly by			06:01-12:00
22-7-2020	S2	11:55:19	11:55:31	Insecta	Hymenoptera	Apidae		Bombus		Fly by			06:01-12:00
22-7-2020	S2	12:45:54	12:46:05	Insecta	Hymenoptera	Apidae		Bombus		Fly by			12:01-18:00
22-7-2020	S2	13:09:32	13:09:42	Insecta	Hymenoptera	Apidae		Bombus		Fly by			12:01-18:00
22-7-2020	S2	13:40:45	13:40:57	Insecta	Hymenoptera	Apidae		Bombus		Fly by			12:01-18:00
22-7-2020	S2	13:48:41	13:48:52	Insecta	Hymenoptera	Apidae		Bombus		Fly by			12:01-18:00
22-7-2020	S2	14:00:34	14:00:46	Insecta	Hymenoptera	Apidae		Bombus		Fly by			12:01-18:00
22-7-2020	S2	13:28:56	13:29:06	Insecta	Diptera	Syrphidae	Syrphinae			Hovered near flowers	P. dilatata		12:01-18:00
22-7-2020	S2	13:41:05	13:41:20	Insecta	Diptera	Syrphidae	Syrphinae			Hovered near flowers	P. dilatata		12:01-18:00
22-7-2020	S2	13:44:55	13:45:06	Insecta	Diptera	Syrphidae	Syrphinae			Hovered near flowers	P. dilatata		12:01-18:00
22-7-2020	S2	20:09:25	20:09:36	Insecta						Landed on flower	P. dilatata		18:01-24:00
22-7-2020	S2	20:12:34	20:12:45	Insecta						Fly by			18:01-24:00
22-7-2020	S2	20:14:31	20:14:44	Insecta						Fly by			18:01-24:00
22-7-2020	S2	20:16:22	20:16:35	Insecta						Fly by			18:01-24:00
22-7-2020	S2	20:19:31	20:19:43	Insecta						Fly by			18:01-24:00
22-7-2020	S2	20:29:28	20:29:42	Insecta						Fly by			18:01-24:00
22-7-2020	S2	20:35:12	20:35:22	Insecta						Fly by			18:01-24:00
22-7-2020	S2	20:35:12	20:35:22	Insecta	Diptera					Other			18:01-24:00
22-7-2020	S2	20:38:24	20:38:35	Insecta						Fly by			18:01-24:00
22-7-2020	S2	20:41:08	20:41:27	Insecta						Fly by			18:01-24:00
22-7-2020	S2	20:43:06	20:43:31	Insecta	Diptera					Fly by			18:01-24:00
22-7-2020	S2	20:43:06	20:43:31	Insecta						Fly by			18:01-24:00
22-7-2020	S2	20:47:00	20:47:12	Insecta						Fly by			18:01-24:00
22-7-2020	S2	21:00:32	21:00:44	Insecta						Fly by			18:01-24:00
22-7-2020	S2	12:48:34	12:48:45	Insecta	Diptera	Syrphidae				Fly by			12:01-18:00
22-7-2020	S2	13:22:01	13:22:13	Arachnida						Other			12:01-18:00
22-7-2020	S2	13:22:14	13:22:24	Arachnida						Other			12:01-18:00
23-7-2020	S2	11:24:10	11:24:27	Insecta	Hymenoptera	Apidae		Bombus	flavifrons	Active on flower	P. dilatata	Y	06:01-12:00
23-7-2020	S2	11:35:28	11:36:02	Insecta	Hymenoptera	Apidae		Bombus	flavifrons	Active on flower	P. dilatata	Y	06:01-12:00
23-7-2020	S2	11:58:24	11:58:47	Insecta	Hymenoptera	Apidae		Bombus	flavifrons	Active on flower	P. dilatata	Y	06:01-12:00
23-7-2020	S2	14:44:18	14:45:03	Insecta	Hymenoptera	Apidae		Bombus	flavifrons	Active on flower	P. dilatata	Y	12:01-18:00
23-7-2020	S2	15:53:34	15:53:53	Insecta	Hymenoptera	Apidae		Bombus	flavifrons	Active on flower	P. dilatata	Y	12:01-18:00
23-7-2020	S2	11:38:47	11:39:02	Insecta	Hymenoptera	Apidae		Bombus		Hovered near flowers	P. dilatata		06:01-12:00
23-7-2020	S2	11:54:55	11:55:06	Insecta	Hymenoptera	Apidae		Bombus		Hovered near flowers	P. dilatata		06:01-12:00
23-7-2020	S2	11:58:20	11:58:32	Insecta	Hymenoptera	Apidae		Bombus		Fly by			06:01-12:00
23-7-2020	S2	15:10:26	15:10:40	Insecta	Hymenoptera	Apidae		Bombus		Landed on flower	P. dilatata	Y	12:01-18:00
23-7-2020	S2	07:22:01	07:22:20	Insecta	Diptera					Fly by			06:01-12:00
23-7-2020	S2	10:09:35	10:09:50	Arachnida						Other			06:01-12:00
23-7-2020	S2	10:11:28	10:12:02	Insecta	Diptera					Fly by			06:01-12:00
23-7-2020	S2	10:12:38	10:12:49	Arachnida						Other			06:01-12:00
23-7-2020	S2	10:13:06	10:13:21	Arachnida						Other			06:01-12:00
23-7-2020	S2	10:18:01	10:18:23	Arachnida						Other			06:01-12:00
23-7-2020	S2	10:18:33	10:18:44	Arachnida						Other			06:01-12:00
23-7-2020	S2	10:21:51	10:22:02	Arachnida						Other			06:01-12:00
23-7-2020	S2	10:25:14	10:25:26	Arachnida						Other			06:01-12:00
23-7-2020	S2	11:51:29	11:51:43	Arachnida						Other			06:01-12:00
23-7-2020	S2	13:02:39	13:02:50	Insecta	Diptera	Syrphidae				Fly by			12:01-18:00
23-7-2020	S2	14:37:58	14:38:09	Arachnida						On web			12:01-18:00
23-7-2020	S2	14:39:18	14:39:36	Arachnida						On web			12:01-18:00
23-7-2020	S2	14:40:18	14:40:33	Arachnida						On web			12:01-18:00
23-7-2020	S2	15:09:18	15:09:29	Insecta						Fly by			12:01-18:00
23-7-2020	S2	15:57:07	15:57:19	Insecta						Fly by			12:01-18:00
23-7-2020	S2	16:00:23	16:00:34	Insecta						Fly by			12:01-18:00
23-7-2020	S2	17:06:48	17:06:59	Arachnida						Other			12:01-18:00
23-7-2020	S2	17:32:12	17:32:24	Insecta	Diptera					Other			12:01-18:00
23-7-2020	S2	17:55:58	17:56:10	Insecta						Fly by			12:01-18:00
23-7-2020	S2	20:12:19	20:12:30	Insecta						Fly by			18:01-24:00
23-7-2020	S2	20:19:32	20:19:44	Insecta						Fly by			18:01-24:00
24-7-2020	S2	10:28:18	10:29:03	Insecta	Hymenoptera	Apidae		Bombus	flavifrons	Active on flower	P. dilatata	Y	06:01-12:00
24-7-2020	S2	10:29:06	10:29:34	Insecta	Hymenoptera	Apidae		Bombus	flavifrons	Active on flower	P. dilatata	Y	06:01-12:00
24-7-2020	S2	10:34:28	10:34:39	Insecta	Hymenoptera	Apidae		Bombus	flavifrons	Landed on flower	P. dilatata		06:01-12:00
24-7-2020	S2	15:02:53	15:03:06	Insecta	Hymenoptera	Apidae		Bombus	flavifrons	Landed on flower	P. dilatata		12:01-18:00
24-7-2020	S2	12:42:32	12:42:45	Insecta	Hymenoptera	Apidae		Bombus	vancouverensis	Hovered near flowers	P. dilatata		12:01-18:00
24-7-2020	S2	11:10:20	11:10:32	Insecta	Hymenoptera	Apidae		Bombus		Hovered near flowers	P. dilatata		06:01-12:00
24-7-2020	S2	11:55:04	11:55:16	Insecta	Hymenoptera	Apidae		Bombus		Fly by			06:01-12:00
24-7-2020	S2	12:53:49	12:54:07	Insecta	Hymenoptera	Apidae		Bombus		Fly by			12:01-18:00
24-7-2020	S2	13:39:02	13:39:13	Insecta	Hymenoptera	Apidae		Bombus		Active on flower	P. dilatata	N	12:01-18:00
24-7-2020	S2	14:12:11	14:12:23	Insecta	Hymenoptera	Apidae		Bombus		Fly by			12:01-18:00
24-7-2020	S2	14:15:42	14:15:53	Insecta	Hymenoptera	Apidae		Bombus		Fly by			12:01-18:00
24-7-2020	S2	14:51:50	14:52:02	Insecta	Hymenoptera	Apidae		Bombus		Fly by			12:01-18:00
24-7-2020	S2	14:58:47	14:58:58	Insecta	Hymenoptera	Apidae		Bombus		Fly by			12:01-18:00
24-7-2020	S2	15:00:07	15:00:26	Insecta	Hymenoptera	Apidae		Bombus		Fly by			12:01-18:00
24-7-2020	S2	15:00:07	15:00:26	Insecta	Hymenoptera	Apidae		Bombus		Fly by			12:01-18:00
24-7-2020	S2	15:19:37	15:19:50	Insecta	Hymenoptera	Apidae		Bombus		Fly by			12:01-18:00
24-7-2020	S2	15:23:12	15:23:24	Insecta	Hymenoptera	Apidae		Bombus		Hovered near flowers	P. dilatata		12:01-18:00
24-7-2020	S2	15:32:05	15:32:15	Insecta	Hymenoptera	Apidae		Bombus		Fly by			12:01-18:00
24-7-2020	S2	16:51:57	16:52:10	Insecta	Hymenoptera	Apidae		Bombus		Hovered near flowers	P. dilatata		12:01-18:00
24-7-2020	S2	18:30:24	18:30:36	Insecta	Hymenoptera	Apidae		Bombus		Fly by			18:01-24:00
24-7-2020	S2	19:31:58	19:32:10	Insecta	Hymenoptera	Apidae		Bombus		Fly by			18:01-24:00
24-7-2020	S2	21:21:36	21:21:47	Insecta						Fly by			18:01-24:00
24-7-2020	S2	21:26:50	21:27:02	Insecta						Fly by			18:01-24:00
24-7-2020	S2	09:23:19	09:23:30	Arachnida						Other			06:01-12:00
24-7-2020	S2	09:23:44	09:23:56	Arachnida						Other			06:01-12:00
24-7-2020	S2	09:58:27	09:58:43	Arachnida						Other			06:01-12:00
24-7-2020	S2	09:58:56	09:59:09	Arachnida						Other			06:01-12:00
24-7-2020	S2	11:08:03	11:08:25	Insecta	Diptera	Syrphidae				Fly by			06:01-12:00
24-7-2020	S2	11:28:22	11:28:33	Insecta	Diptera					Other			06:01-12:00
24-7-2020	S2	11:43:24	11:43:34	Arachnida						Other			06:01-12:00
24-7-2020	S2	11:45:45	11:46:01	Arachnida						Other			06:01-12:00
24-7-2020	S2	11:48:44	11:48:54	Arachnida						Other			06:01-12:00
24-7-2020	S2	11:51:56	11:52:07	Arachnida						Other			06:01-12:00
24-7-2020	S2	11:53:26	11:53:36	Arachnida						Other			06:01-12:00
24-7-2020	S2	11:53:41	11:53:51	Arachnida						Other			06:01-12:00
24-7-2020	S2	11:54:03	11:54:14	Arachnida						Other			06:01-12:00
24-7-2020	S2	11:56:02	11:56:15	Arachnida						Other			06:01-12:00
24-7-2020	S2	11:56:45	11:57:27	Arachnida						Other			06:01-12:00
24-7-2020	S2	12:02:04	12:02:21	Arachnida						Other			12:01-18:00
24-7-2020	S2	12:02:53	12:03:19	Arachnida						Other			12:01-18:00
24-7-2020	S2	12:05:08	12:05:23	Arachnida						Other			12:01-18:00
24-7-2020	S2	12:11:39	12:12:03	Arachnida						Other			12:01-18:00
24-7-2020	S2	12:16:31	12:17:08	Arachnida						Other			12:01-18:00
24-7-2020	S2	12:23:06	12:23:20	Arachnida						Other			12:01-18:00
24-7-2020	S2	12:25:11	12:25:24	Arachnida						Other			12:01-18:00
24-7-2020	S2	12:25:26	12:25:47	Arachnida						Other			12:01-18:00
24-7-2020	S2	12:25:59	12:26:25	Arachnida						Other			12:01-18:00
24-7-2020	S2	12:44:21	12:44:32	Arachnida						Other			12:01-18:00
24-7-2020	S2	12:45:39	12:45:55	Arachnida						Other			12:01-18:00
24-7-2020	S2	12:47:53	12:48:04	Arachnida						Other			12:01-18:00
24-7-2020	S2	12:55:44	12:55:55	Arachnida						Other			12:01-18:00
24-7-2020	S2	13:17:23	13:17:46	Arachnida						Other			12:01-18:00
24-7-2020	S2	13:49:15	13:49:28	Arachnida						Other			12:01-18:00
24-7-2020	S2	13:52:34	13:52:56	Arachnida						Other			12:01-18:00
24-7-2020	S2	13:54:18	13:54:29	Arachnida						Other			12:01-18:00
24-7-2020	S2	13:57:16	13:57:30	Arachnida						Other			12:01-18:00
24-7-2020	S2	15:00:34	15:00:43	Insecta	Diptera					Other			12:01-18:00
24-7-2020	S2	15:01:09	15:01:19	Insecta	Diptera					Other			12:01-18:00
24-7-2020	S2	15:02:07	15:02:19	Insecta	Diptera					Other			12:01-18:00
24-7-2020	S2	15:04:06	15:04:34	Insecta	Diptera					Other			12:01-18:00
24-7-2020	S2	15:46:29	15:46:58	Insecta						Other			12:01-18:00
24-7-2020	S2	15:47:27	15:47:39	Insecta						Other			12:01-18:00
24-7-2020	S2	15:52:45	15:52:58	Arachnida						Other			12:01-18:00
24-7-2020	S2	17:21:43	17:21:53	Insecta	Diptera	Syrphidae				Fly by			12:01-18:00
24-7-2020	S2	17:33:38	17:33:49	Insecta						Other			12:01-18:00
24-7-2020	S2	18:08:54	18:09:17	Arachnida						Other			18:01-24:00
24-7-2020	S2	18:08:54	18:09:17	Insecta						Other			18:01-24:00
24-7-2020	S2	19:24:16	19:24:29	Arachnida						Other			18:01-24:00
25-7-2020	S2	10:16:26	10:16:43	Insecta	Diptera	Syrphidae		Lapposyrphus	lapponicus	Hovered near flowers	P. dilatata		06:01-12:00
25-7-2020	S2	10:16:01	10:16:45	Insecta	Diptera	Syrphidae	Syrphinae			Landed on flower	P. dilatata		06:01-12:00
25-7-2020	S3	16:40:01	16:40:32	Insecta	Hymenoptera	Apidae		Bombus	melanopygus	Hovered near flowers	P. dilatata		12:01-18:00
25-7-2020	S3	15:13:09	15:13:23	Insecta	Diptera	Syrphidae	Syrphinae			Hovered near flowers	P. stricta, P. dilatata		12:01-18:00
25-7-2020	S3	15:13:23	15:13:36	Insecta	Diptera	Syrphidae	Syrphinae			Hovered near flowers	P. dilatata		12:01-18:00
25-7-2020	S3	15:20:10	15:20:50	Insecta	Diptera	Syrphidae	Syrphinae			Hovered near flowers	P. dilatata		12:01-18:00
25-7-2020	S3	15:28:12	15:28:23	Insecta						Other			12:01-18:00
25-7-2020	S3	15:43:54	15:44:07	Insecta	Diptera	Syrphidae	Syrphinae			Landed on flower	P. dilatata		12:01-18:00
25-7-2020	S3	16:54:27	16:54:54	Insecta	Diptera	Syrphidae	Syrphinae			Landed on flower	P. dilatata		12:01-18:00
25-7-2020	S3	17:10:29	17:10:46	Insecta	Diptera	Syrphidae				Fly by			12:01-18:00
25-7-2020	S3	17:16:12	17:16:23	Insecta	Diptera	Syrphidae	Syrphinae			Hovered near flowers	P. stricta		12:01-18:00
25-7-2020	S3	18:47:18	18:47:29	Insecta	Diptera	Syrphidae				Fly by			18:01-24:00
25-7-2020	S3	19:06:31	19:06:44	Insecta	Lepidoptera	Pterophoridae				Active on flower	P. stricta, P. dilatata		18:01-24:00
25-7-2020	S3	19:06:31	19:06:44	Insecta	Lepidoptera	Pterophoridae				On flower	P. stricta		18:01-24:00
25-7-2020	S3	19:06:31	19:06:44	Insecta	Lepidoptera	Pterophoridae				On flower	P. stricta		18:01-24:00
25-7-2020	S3	19:16:21	19:16:52	Insecta	Lepidoptera	Pterophoridae				On flower	P. stricta		18:01-24:00
25-7-2020	S3	19:16:21	19:16:52	Insecta	Lepidoptera	Pterophoridae				On flower	P. stricta		18:01-24:00
25-7-2020	S3	19:16:21	19:16:52	Insecta	Lepidoptera	Pterophoridae				On flower	P. stricta		18:01-24:00
25-7-2020	S3	19:16:21	19:16:52	Arachnida						Other			18:01-24:00
25-7-2020	S3	19:17:38	19:18:05	Insecta	Lepidoptera	Pterophoridae				On flower	P. stricta		18:01-24:00
25-7-2020	S3	19:17:38	19:18:05	Insecta	Lepidoptera	Pterophoridae				On flower	P. stricta, P. dilatata		18:01-24:00
25-7-2020	S3	19:18:29	19:18:41	Insecta	Lepidoptera	Pterophoridae				On flower	P. stricta, P. dilatata		18:01-24:00
25-7-2020	S3	19:34:43	19:34:54	Insecta	Hymenoptera	Vespidae				Hovered near flowers	P. dilatata		18:01-24:00
25-7-2020	S3	19:34:43	19:34:54	Insecta	Lepidoptera	Pterophoridae				On plant	P. stricta		18:01-24:00
25-7-2020	S3	19:58:16	19:58:27	Insecta	Lepidoptera	Pterophoridae				Landed on flower	P. dilatata		18:01-24:00
25-7-2020	S3	19:58:16	19:58:27	Insecta	Lepidoptera	Pterophoridae				On flower	P. stricta		18:01-24:00
25-7-2020	S3	20:21:22	20:21:41	Insecta	Lepidoptera	Pterophoridae				On plant	P. stricta		18:01-24:00
25-7-2020	S3	20:57:47	20:58:03	Insecta	Lepidoptera	Pterophoridae				Landed on flower	P. stricta		18:01-24:00
25-7-2020	S3	21:08:59	21:09:10	Insecta	Lepidoptera	Pterophoridae				Fly by			18:01-24:00
26-7-2020	S3	14:31:56	14:32:09	Insecta	Hymenoptera	Apidae		Bombus	melanopygus	Landed on flower	P. dilatata		12:01-18:00
26-7-2020	S3	18:51:49	18:52:00	Insecta	Hymenoptera	Apidae		Bombus	melanopygus	Landed on flower	P. dilatata		18:01-24:00
26-7-2020	S3	09:57:55	09:58:11	Insecta	Hymenoptera	Apidae		Bombus		Active on flower	P. dilatata	Y	06:01-12:00
26-7-2020	S3	12:16:45	12:17:05	Insecta	Hymenoptera	Apidae		Bombus		Fly by			12:01-18:00
26-7-2020	S3	14:05:06	14:05:17	Insecta	Hymenoptera	Apidae		Bombus		Fly by			12:01-18:00
26-7-2020	S3	15:15:15	15:15:27	Insecta	Hymenoptera	Apidae		Bombus		Active on flower	P. dilatata	N	12:01-18:00
26-7-2020	S3	18:31:36	18:31:46	Insecta	Hymenoptera	Apidae		Bombus		Fly by			18:01-24:00
26-7-2020	S3	17:56:47	17:57:16	Insecta	Diptera	Syrphidae		Eristalis		Active on flower	P. dilatata	N	12:01-18:00
26-7-2020	S3	23:23:43	23:23:54	Arachnida						Other			18:01-24:00
26-7-2020	S3	06:19:58	06:20:10	Arachnida						Other			06:01-12:00
26-7-2020	S3	06:20:27	06:20:40	Arachnida						Other			06:01-12:00
26-7-2020	S3	06:24:54	06:25:09	Arachnida						Other			06:01-12:00
26-7-2020	S3	06:27:01	06:27:12	Arachnida						Other			06:01-12:00
26-7-2020	S3	10:35:49	10:36:02	Insecta	Diptera	Syrphidae	Syrphinae			Hovered near flowers	P. dilatata		06:01-12:00
26-7-2020	S3	12:15:16	12:15:28	Insecta	Diptera	Syrphidae				Fly by			12:01-18:00
26-7-2020	S3	12:26:05	12:26:25	Insecta	Diptera	Syrphidae				Fly by			12:01-18:00
26-7-2020	S3	12:28:03	12:28:15	Insecta	Diptera	Syrphidae				Flew off plant	P. dilatata		12:01-18:00
26-7-2020	S3	13:20:21	13:20:35	Insecta	Lepidoptera	Pterophoridae				Landed on flower	P. dilatata		12:01-18:00
26-7-2020	S3	13:21:19	13:21:29	Insecta	Lepidoptera	Pterophoridae				Landed on flower	P. dilatata		12:01-18:00
26-7-2020	S3	15:15:46	15:15:59	Insecta	Hymenoptera	Formicidae				Other			12:01-18:00
26-7-2020	S3	15:34:32	15:34:48	Insecta	Diptera	Syrphidae	Syrphinae			Landed on flower	P. stricta		12:01-18:00
26-7-2020	S3	15:34:32	15:34:48	Insecta	Hymenoptera	Formicidae				Other			12:01-18:00
26-7-2020	S3	15:34:48	15:35:01	Insecta	Diptera	Syrphidae	Syrphinae			Flew off flower	P. stricta		12:01-18:00
26-7-2020	S3	15:44:29	15:44:42	Insecta	Diptera	Syrphidae	Syrphinae			Hovered near flowers	P. dilatata		12:01-18:00
26-7-2020	S3	18:19:31	18:19:43	Insecta	Diptera	Syrphidae	Syrphinae			Landed on flower	P. dilatata		18:01-24:00
26-7-2020	S3	19:29:11	19:29:23	Insecta	Lepidoptera	Pterophoridae				Landed on flower	P. dilatata		18:01-24:00
26-7-2020	S3	19:46:22	19:46:34	Insecta	Lepidoptera	Pterophoridae				Landed on flower	P. dilatata		18:01-24:00
26-7-2020	S3	19:52:50	19:53:10	Insecta	Lepidoptera	Pterophoridae				Landed on flower	P. dilatata		18:01-24:00
26-7-2020	S3	20:04:20	20:04:31	Insecta	Diptera	Syrphidae				Fly by			18:01-24:00
26-7-2020	S3	20:04:25	20:04:37	Arachnida						Other			18:01-24:00
27-7-2020	S3	16:52:39	16:52:49	Insecta	Hymenoptera	Apidae		Bombus	melanopygus	Active on flower	P. dilatata		12:01-18:00
27-7-2020	S3	10:15:03	10:15:15	Insecta	Hymenoptera	Apidae		Bombus		Hovered near flowers	P. dilatata		06:01-12:00
27-7-2020	S3	12:52:45	12:52:59	Insecta	Hymenoptera	Apidae		Bombus		Landed on flower	P. dilatata		12:01-18:00
27-7-2020	S3	04:48:42	04:48:56	Insecta	Lepidoptera	Noctuidae				Active on flower	P. dilatata	Y	00:01-06:00
27-7-2020	S3	08:53:29	08:53:44	Insecta	Hymenoptera	Formicidae				Other			06:01-12:00
27-7-2020	S3	08:54:08	08:54:20	Insecta	Hymenoptera	Formicidae				Other			06:01-12:00
27-7-2020	S3	08:54:51	08:55:06	Insecta	Hymenoptera	Formicidae				Other			06:01-12:00
27-7-2020	S3	12:53:06	12:53:22	Insecta	Diptera	Syrphidae				Fly by			12:01-18:00
27-7-2020	S3	14:18:41	14:18:54	Insecta	Diptera	Syrphidae				Fly by			12:01-18:00
27-7-2020	S3	15:10:29	15:10:41	Insecta	Diptera	Bombyliidae				Hovered near flowers	P. dilatata		12:01-18:00
27-7-2020	S3	15:41:21	15:41:33	Insecta	Diptera					Other			12:01-18:00
27-7-2020	S3	18:26:02	18:26:13	Insecta	Hymenoptera	Formicidae				Other			18:01-24:00
27-7-2020	S3	18:26:43	18:26:55	Insecta	Diptera	Syrphidae	Syrphinae			Hovered near flowers	P. dilatata		18:01-24:00
27-7-2020	S3	19:11:04	19:11:14	Insecta	Diptera	Syrphidae				Fly by			18:01-24:00
27-7-2020	S3	19:20:02	19:20:14	Insecta						Fly by			18:01-24:00
27-7-2020	S3	19:32:09	19:32:19	Insecta						Fly by			18:01-24:00
27-7-2020	S3	19:57:33	19:57:44	Insecta	Diptera					Fly by			18:01-24:00
27-7-2020	S3	20:09:58	20:10:08	Insecta	Diptera	Syrphidae	Syrphinae			Landed on flower	P. dilatata		18:01-24:00
27-7-2020	S3	20:11:04	20:11:21	Insecta	Lepidoptera	Pterophoridae				Active on flower	P. stricta	N	18:01-24:00
27-7-2020	S3	20:11:27	20:11:39	Insecta	Lepidoptera	Pterophoridae				Flew off flower	P. stricta		18:01-24:00
28-7-2020	S3	14:47:45	14:47:58	Insecta	Hymenoptera	Apidae		Bombus	melanopygus	Active on flower	P. dilatata		12:01-18:00
28-7-2020	S3	14:47:57	14:48:14	Insecta	Hymenoptera	Apidae		Bombus	melanopygus	Landed on flower	P. dilatata		12:01-18:00
28-7-2020	S3	05:53:12	05:53:26	Arachnida						Other			00:01-06:00
28-7-2020	S3	05:59:32	05:59:44	Arachnida						Other			00:01-06:00
28-7-2020	S3	06:02:04	06:02:16	Arachnida						Other			06:01-12:00
28-7-2020	S3	06:41:48	06:42:00	Arachnida						Other			06:01-12:00
28-7-2020	S3	06:53:39	06:53:57	Insecta	Diptera	Syrphidae				Fly by			06:01-12:00
28-7-2020	S3	06:55:59	06:56:10	Insecta						Fly by			06:01-12:00
28-7-2020	S3	07:12:05	07:12:19	Insecta	Diptera	Syrphidae				Fly by			06:01-12:00
28-7-2020	S3	07:12:40	07:12:52	Arachnida						Other			06:01-12:00
28-7-2020	S3	07:19:45	07:19:57	Arachnida						Other			06:01-12:00
28-7-2020	S3	07:50:28	07:50:39	Insecta	Diptera	Syrphidae	Syrphinae			Hovered near flowers	P. dilatata		06:01-12:00
28-7-2020	S3	08:27:27	08:27:40	Insecta	Diptera	Syrphidae				Fly by			06:01-12:00
28-7-2020	S3	08:56:19	08:56:31	Insecta						Fly by			06:01-12:00
28-7-2020	S3	09:31:19	09:31:33	Insecta	Diptera	Syrphidae	Syrphinae			Hovered near flowers	P. dilatata		06:01-12:00
28-7-2020	S3	10:30:04	10:30:23	Insecta	Diptera	Syrphidae	Syrphinae			Hovered near flowers	P. dilatata		06:01-12:00
28-7-2020	S3	13:13:11	13:13:31	Insecta	Hymenoptera	Formicidae				Other			12:01-18:00
28-7-2020	S3	13:14:03	13:14:14	Insecta	Hymenoptera	Formicidae				Other			12:01-18:00
28-7-2020	S3	13:15:25	13:15:37	Insecta	Hymenoptera	Formicidae				Other			12:01-18:00
28-7-2020	S3	13:18:10	13:18:30	Insecta	Hymenoptera	Formicidae				Other			12:01-18:00
28-7-2020	S3	13:32:45	13:32:56	Insecta	Hymenoptera	Formicidae				Other			12:01-18:00
28-7-2020	S3	14:42:40	14:42:52	Insecta						Other			12:01-18:00
28-7-2020	S3	17:08:55	17:09:05	Insecta						Fly by			12:01-18:00
28-7-2020	S3	21:05:32	21:05:43	Insecta	Diptera					Fly by			18:01-24:00
29-7-2020	S3	06:20:29	06:20:40	Insecta	Diptera					Fly by			06:01-12:00
29-7-2020	S3	06:48:04	06:48:15	Insecta						Fly by			06:01-12:00
29-7-2020	S3	09:25:55	09:26:07	Arachnida						Other			06:01-12:00
25-7-2020	S4	18:26:58	18:27:43	Insecta	Hymenoptera	Apidae		Bombus	flavifrons	Active on flower	P. dilatata	Y	18:01-24:00
25-7-2020	S4	16:24:45	16:24:55	Insecta	Hymenoptera	Apidae		Bombus		Fly by			12:01-18:00
25-7-2020	S4	16:57:04	16:57:16	Insecta	Diptera	Syrphidae	Syrphinae			Hovered near flowers	P. dilatata		12:01-18:00
25-7-2020	S4	17:51:07	17:51:19	Insecta						Fly by			12:01-18:00
25-7-2020	S4	18:24:56	18:25:41	Arachnida						Other			18:01-24:00
25-7-2020	S4	18:29:21	18:29:32	Insecta	Diptera	Syrphidae				Fly by			18:01-24:00
25-7-2020	S4	18:57:39	18:57:51	Insecta	Lepidoptera					Other			18:01-24:00
25-7-2020	S4	18:58:24	18:58:36	Insecta	Lepidoptera					Other			18:01-24:00
25-7-2020	S4	19:19:08	19:19:18	Insecta	Hymenoptera	Formicidae				On plant	P. dilatata		18:01-24:00
25-7-2020	S4	19:19:08	19:19:18	Insecta	Lepidoptera					Other			18:01-24:00
26-7-2020	S4	14:48:06	14:48:19	Insecta	Diptera	Syrphidae		Sericomyia	chalcopyga	Landed on flower	P. dilatata		12:01-18:00
26-7-2020	S4	10:16:59	10:17:20	Insecta	Hymenoptera	Apidae		Bombus	melanopygus	Landed on flower	P. dilatata		06:01-12:00
26-7-2020	S4	16:46:23	16:46:40	Insecta	Hymenoptera	Apidae		Bombus	melanopygus	Landed on flower	P. dilatata		12:01-18:00
26-7-2020	S4	14:25:47	14:26:07	Insecta	Hymenoptera	Apidae		Bombus		Fly by			12:01-18:00
26-7-2020	S4	15:36:52	15:37:37	Insecta	Hymenoptera	Apidae		Bombus		Active on flower	P. dilatata	N	12:01-18:00
26-7-2020	S4	17:31:07	17:31:21	Insecta	Hymenoptera	Apidae		Bombus		Fly by			12:01-18:00
26-7-2020	S4	17:31:07	17:31:21	Insecta	Hymenoptera	Formicidae		Campanotus		On flower	P. dilatata		12:01-18:00
26-7-2020	S4	12:23:17	12:23:30	Insecta	Diptera	Syrphidae		Eristalis		Active on flower	P. dilatata		12:01-18:00
26-7-2020	S4	08:08:33	08:08:43	Insecta	Diptera	Syrphidae				Fly by			06:01-12:00
26-7-2020	S4	08:11:11	08:11:21	Insecta	Diptera	Syrphidae	Syrphinae			Landed on flower	P. dilatata		06:01-12:00
26-7-2020	S4	08:24:22	08:24:42	Insecta	Lepidoptera					Other			06:01-12:00
26-7-2020	S4	08:31:27	08:31:39	Insecta	Diptera					On flower	P. dilatata		06:01-12:00
26-7-2020	S4	09:38:30	09:38:43	Insecta	Lepidoptera					Other			06:01-12:00
26-7-2020	S4	09:41:17	09:41:28	Insecta						Other			06:01-12:00
26-7-2020	S4	09:59:46	10:00:03	Insecta	Diptera					On plant	P. dilatata		06:01-12:00
26-7-2020	S4	10:06:20	10:06:30	Insecta	Diptera					Other			06:01-12:00
26-7-2020	S4	10:07:12	10:07:22	Insecta	Diptera					Other			06:01-12:00
26-7-2020	S4	10:08:40	10:08:51	Insecta	Diptera					Other			06:01-12:00
26-7-2020	S4	10:11:23	10:11:38	Insecta	Diptera	Syrphidae	Syrphinae			Landed on flower	P. dilatata		06:01-12:00
26-7-2020	S4	12:04:48	12:05:12	Insecta	Diptera	Syrphidae	Syrphinae			Landed on flower	P. dilatata		12:01-18:00
26-7-2020	S4	12:19:00	12:19:22	Insecta	Diptera	Syrphidae	Syrphinae			Active on flower	P. dilatata	N	12:01-18:00
26-7-2020	S4	12:55:11	12:55:22	Insecta	Diptera	Syrphidae				Fly by			12:01-18:00
26-7-2020	S4	13:09:53	13:10:07	Arachnida						Other			12:01-18:00
26-7-2020	S4	16:35:48	16:36:00	Insecta	Hymenoptera	Apidae				Fly by			12:01-18:00
26-7-2020	S4	16:42:59	16:43:11	Insecta	Diptera	Syrphidae	Syrphinae			Landed on flower	P. dilatata		12:01-18:00
26-7-2020	S4	16:46:23	16:46:40	Insecta	Hymenoptera	Formicidae				On flower	P. dilatata		12:01-18:00
26-7-2020	S4	19:11:40	19:11:52	Insecta	Diptera	Syrphidae				Fly by			18:01-24:00
26-7-2020	S4	19:49:32	19:49:47	Insecta	Diptera	Syrphidae				Fly by			18:01-24:00
26-7-2020	S4	20:22:34	20:22:45	Insecta						Other			18:01-24:00
27-7-2020	S4	17:13:07	17:13:39	Insecta	Hymenoptera	Apidae		Bombus	mixtus	Active on flower	P. dilatata	Y	12:01-18:00
27-7-2020	S4	15:00:37	15:00:55	Insecta	Hymenoptera	Apidae		Bombus		Fly by			12:01-18:00
27-7-2020	S4	17:13:07	17:13:39	Insecta	Diptera	Syrphidae	Syrphinae			Landed on flower	P. dilatata		12:01-18:00
27-7-2020	S4	11:30:57	11:31:08	Insecta	Hymenoptera	Formicidae				Other			06:01-12:00
27-7-2020	S4	20:00:20	20:00:35	Insecta	Diptera	Syrphidae				Fly by			18:01-24:00
27-7-2020	S4	20:38:06	20:38:18	Insecta						Other			18:01-24:00
28-7-2020	S4	15:51:34	15:51:47	Insecta	Hymenoptera	Apidae		Bombus		Fly by			12:01-18:00
28-7-2020	S4	08:25:50	08:26:05	Insecta	Diptera	Syrphidae		Platycheirus		Hovered near flowers	P. dilatata		06:01-12:00
28-7-2020	S4	06:15:01	06:15:11	Insecta	Diptera					Fly by			06:01-12:00
28-7-2020	S4	06:46:22	06:46:32	Insecta	Diptera					Fly by			06:01-12:00
28-7-2020	S4	07:10:49	07:11:00	Insecta	Hymenoptera	Formicidae				Other			06:01-12:00
28-7-2020	S4	07:13:11	07:13:22	Insecta	Diptera					Fly by			06:01-12:00
28-7-2020	S4	07:32:15	07:32:26	Insecta	Diptera					Fly by			06:01-12:00
28-7-2020	S4	07:49:18	07:49:33	Insecta	Diptera					Other			06:01-12:00
28-7-2020	S4	07:50:57	07:51:07	Insecta	Diptera					Other			06:01-12:00
28-7-2020	S4	07:59:29	07:59:40	Arachnida						Other			06:01-12:00
28-7-2020	S4	07:59:44	07:59:54	Arachnida						Other			06:01-12:00
28-7-2020	S4	08:04:32	08:04:46	Arachnida						Other			06:01-12:00
28-7-2020	S4	08:04:53	08:05:15	Insecta	Hymenoptera	Formicidae				On plant	P. dilatata		06:01-12:00
28-7-2020	S4	08:04:53	08:05:15	Arachnida						Other			06:01-12:00
28-7-2020	S4	08:08:25	08:08:36	Arachnida						Other			06:01-12:00
28-7-2020	S4	08:08:52	08:09:05	Arachnida						Other			06:01-12:00
28-7-2020	S4	08:09:07	08:09:20	Arachnida						Other			06:01-12:00
28-7-2020	S4	08:14:03	08:14:13	Insecta	Diptera	Syrphidae				Fly by			06:01-12:00
28-7-2020	S4	09:18:14	09:18:27	Insecta	Diptera	Syrphidae				Fly by			06:01-12:00
28-7-2020	S4	10:03:15	10:03:27	Insecta	Diptera	Syrphidae				Fly by			06:01-12:00
28-7-2020	S4	10:32:27	10:32:39	Insecta	Diptera	Syrphidae	Syrphinae			On flower	P. dilatata		06:01-12:00
28-7-2020	S4	10:44:30	10:44:41	Insecta	Diptera	Syrphidae				Fly by			06:01-12:00
28-7-2020	S4	11:05:14	11:05:54	Insecta	Diptera	Syrphidae				Fly by			06:01-12:00
28-7-2020	S4	11:14:29	11:14:40	Insecta	Diptera	Syrphidae	Syrphinae			Hovered near flowers	P. dilatata		06:01-12:00
28-7-2020	S4	11:14:39	11:14:50	Insecta	Diptera	Syrphidae				Fly by			06:01-12:00
29-7-2020	S4	07:22:54	07:23:05	Insecta	Diptera	Tipulidae				Other			06:01-12:00
1-8-2020	S5	12:13:16	12:13:55	Insecta	Hymenoptera	Apidae		Bombus	flavifrons	Active on flower	P. dilatata	N	12:01-18:00
1-8-2020	S5	15:45:12	15:45:28	Insecta	Hymenoptera	Apidae		Bombus	melanopygus	Active on flower	P. dilatata	N	12:01-18:00
1-8-2020	S5	09:54:59	09:55:15	Insecta	Hymenoptera	Apidae		Bombus	sitkensis	Active on flower	P. dilatata	N	06:01-12:00
1-8-2020	S5	09:55:50	09:56:02	Insecta	Hymenoptera	Apidae		Bombus		Fly by			06:01-12:00
1-8-2020	S5	10:06:42	10:06:54	Insecta	Hymenoptera	Apidae		Bombus		Fly by			06:01-12:00
1-8-2020	S5	10:47:17	10:47:48	Insecta	Hymenoptera	Apidae		Bombus		Landed on flower	P. dilatata	N	06:01-12:00
1-8-2020	S5	11:07:22	11:07:34	Insecta	Hymenoptera	Apidae		Bombus		Fly by			06:01-12:00
1-8-2020	S5	11:43:28	11:43:39	Insecta	Hymenoptera	Apidae		Bombus		Fly by			06:01-12:00
1-8-2020	S5	12:17:59	12:18:29	Insecta	Hymenoptera	Apidae		Bombus		Fly by			12:01-18:00
1-8-2020	S5	12:56:45	12:56:59	Insecta	Hymenoptera	Apidae		Bombus		Landed on flower	P. dilatata		12:01-18:00
1-8-2020	S5	13:00:21	13:00:32	Insecta	Hymenoptera	Apidae		Bombus		Fly by			12:01-18:00
1-8-2020	S5	14:47:15	14:47:30	Insecta	Hymenoptera	Apidae		Bombus		Landed on flower	P. dilatata		12:01-18:00
1-8-2020	S5	17:32:08	17:32:21	Insecta	Hymenoptera	Apidae		Bombus		Landed on flower	P. dilatata		12:01-18:00
1-8-2020	S5	17:40:24	17:40:35	Insecta	Hymenoptera	Apidae		Bombus		Fly by			12:01-18:00
1-8-2020	S5	17:50:00	17:50:18	Insecta	Hymenoptera	Apidae		Bombus		Active on flower	P. dilatata	Y*	12:01-18:00
1-8-2020	S5	18:57:29	18:57:39	Insecta	Hymenoptera	Apidae		Bombus		Fly by			18:01-24:00
1-8-2020	S5	19:02:22	19:02:34	Insecta	Hymenoptera	Apidae		Bombus		Fly by			18:01-24:00
1-8-2020	S5	09:54:59	09:55:15	Insecta						Fly by			06:01-12:00
1-8-2020	S5	10:07:41	10:07:54	Insecta	Diptera	Syrphidae				Fly by			06:01-12:00
1-8-2020	S5	10:28:15	10:28:34	Insecta	Diptera					Landed on flower	P. dilatata		06:01-12:00
1-8-2020	S5	10:46:05	10:46:17	Insecta	Diptera					Landed on flower	P. dilatata		06:01-12:00
1-8-2020	S5	12:01:38	12:01:55	Arachnida						Other			12:01-18:00
1-8-2020	S5	12:02:57	12:03:18	Arachnida						Other			12:01-18:00
1-8-2020	S5	14:45:36	14:45:48	Insecta						Fly by			12:01-18:00
1-8-2020	S5	15:08:25	15:08:36	Insecta	Diptera					Other			12:01-18:00
1-8-2020	S5	15:20:37	15:20:49	Insecta						Other			12:01-18:00
1-8-2020	S5	15:21:08	15:21:23	Arachnida						Other			12:01-18:00
1-8-2020	S5	15:24:28	15:24:39	Insecta						Fly by			12:01-18:00
1-8-2020	S5	16:53:39	16:53:50	Insecta						Fly by			12:01-18:00
1-8-2020	S5	17:30:07	17:30:19	Insecta	Diptera	Syrphidae	Syrphinae			On flower	P. dilatata		12:01-18:00
1-8-2020	S5	17:41:19	17:41:31	Insecta	Diptera	Syrphidae				Fly by			12:01-18:00
1-8-2020	S5	18:11:00	18:11:10	Insecta						Fly by			18:01-24:00
1-8-2020	S5	18:11:19	18:11:33	Insecta	Diptera	Syrphidae				Fly by			18:01-24:00
1-8-2020	S5	18:20:16	18:20:31	Insecta	Diptera					Fly by			18:01-24:00
1-8-2020	S5	18:23:41	18:23:53	Insecta						Fly by			18:01-24:00
1-8-2020	S5	18:24:41	18:24:53	Insecta	Diptera	Syrphidae	Syrphinae			Hovered near flowers	P. dilatata		18:01-24:00
1-8-2020	S5	18:27:44	18:27:56	Insecta						Fly by			18:01-24:00
1-8-2020	S5	18:29:36	18:29:58	Insecta						Fly by			18:01-24:00
1-8-2020	S5	18:41:51	18:42:08	Insecta	Diptera	Syrphidae	Syrphinae			Landed on flower	P. dilatata		18:01-24:00
1-8-2020	S5	19:01:50	19:02:03	Insecta						Fly by			18:01-24:00
1-8-2020	S5	19:14:55	19:15:07	Insecta	Diptera	Syrphidae				Fly by			18:01-24:00
1-8-2020	S5	20:15:41	20:15:42	Insecta						Fly by			18:01-24:00
1-8-2020	S5	20:16:26	20:16:37	Insecta						Fly by			18:01-24:00
2-8-2020	S5	07:29:22	07:29:32	Insecta	Hymenoptera	Apidae		Bombus	melanopygus	Hovered near flowers	P. dilatata		06:01-12:00
2-8-2020	S5	09:14:23	09:14:35	Insecta	Hymenoptera	Apidae		Bombus		Hovered near flowers	P. dilatata		06:01-12:00
2-8-2020	S5	09:18:31	09:18:49	Insecta	Hymenoptera	Apidae		Bombus		Fly by			06:01-12:00
2-8-2020	S5	09:31:38	09:31:49	Insecta	Hymenoptera	Apidae		Bombus		Hovered near flowers	P. dilatata		06:01-12:00
2-8-2020	S5	07:28:08	07:28:42	Insecta	Diptera	Syrphidae	Syrphinae			Landed on flower	P. dilatata		06:01-12:00
2-8-2020	S5	07:49:36	07:50:00	Insecta	Hymenoptera	Formicidae				Other			06:01-12:00
2-8-2020	S5	08:32:41	08:32:52	Insecta	Diptera					Other			06:01-12:00
2-8-2020	S5	09:09:42	09:09:58	Insecta	Diptera	Syrphidae	Syrphinae			Landed on flower	P. dilatata		06:01-12:00
2-8-2020	S5	09:36:02	09:36:26	Insecta	Diptera	Syrphidae	Syrphinae			Landed on flower	P. dilatata		06:01-12:00
2-8-2020	S5	09:36:29	09:36:49	Insecta	Diptera	Syrphidae	Syrphinae			Hovered near flowers	P. dilatata		06:01-12:00
29-7-2020	S5	12:40:36	12:41:21	Insecta	Hymenoptera	Apidae		Bombus	melanopygus	Active on flower	P. dilatata	N	12:01-18:00
29-7-2020	S5	17:17:25	17:18:04	Insecta	Hymenoptera	Apidae		Bombus	sitkensis	Active on flower	P. dilatata	Y	12:01-18:00
29-7-2020	S5	12:34:33	12:34:45	Insecta	Hymenoptera	Apidae		Bombus		Fly by			12:01-18:00
29-7-2020	S5	12:47:23	12:47:34	Insecta	Hymenoptera	Apidae		Bombus		Fly by			12:01-18:00
29-7-2020	S5	17:19:30	17:19:49	Insecta	Hymenoptera	Apidae		Bombus		Active on flower	P. dilatata	N	12:01-18:00
29-7-2020	S5	11:19:27	11:20:00	Insecta	Hymenoptera	Apidae		Bombus		Fly by			06:01-12:00
29-7-2020	S5	12:41:18	12:41:38	Insecta	Hymenoptera	Apidae		Bombus		Active on flower	P. dilatata	Y	12:01-18:00
29-7-2020	S5	18:41:51	18:42:04	Insecta	Hymenoptera	Apidae		Bombus		Landed on flower	P. dilatata		18:01-24:00
29-7-2020	S5	12:23:03	12:23:14	Insecta	Diptera	Syrphidae				Fly by			12:01-18:00
29-7-2020	S5	12:48:31	12:48:42	Insecta	Diptera	Syrphidae	Syrphinae			Landed on flower	P. dilatata		12:01-18:00
29-7-2020	S5	16:50:53	16:51:02	Insecta	Diptera	Syrphidae				Fly by			12:01-18:00
29-7-2020	S5	16:57:39	16:57:49	Insecta	Diptera	Syrphidae	Syrphinae			Hovered near flowers	P. dilatata		12:01-18:00
29-7-2020	S5	18:02:34	18:02:50	Arachnida						Other			18:01-24:00
29-7-2020	S5	18:17:45	18:17:55	Insecta	Diptera	Syrphidae	Syrphinae			On flower	P. dilatata		18:01-24:00
29-7-2020	S5	18:35:39	18:36:04	Insecta						Fly by			18:01-24:00
29-7-2020	S5	18:35:39	18:36:04	Insecta	Lepidoptera					Other			18:01-24:00
29-7-2020	S5	18:36:01	18:36:17	Insecta	Lepidoptera					Other			18:01-24:00
29-7-2020	S5	18:39:01	18:39:14	Insecta	Lepidoptera					Other			18:01-24:00
29-7-2020	S5	18:39:21	18:39:31	Insecta	Lepidoptera					Other			18:01-24:00
29-7-2020	S5	18:39:57	18:40:09	Insecta	Lepidoptera					Other			18:01-24:00
29-7-2020	S5	18:40:20	18:40:35	Insecta						Fly by			18:01-24:00
29-7-2020	S5	18:43:42	18:43:54	Insecta						Fly by			18:01-24:00
29-7-2020	S5	18:55:09	18:55:20	Insecta						Fly by			18:01-24:00
29-7-2020	S5	19:00:42	19:00:54	Insecta	Diptera	Syrphidae				Fly by			18:01-24:00
29-7-2020	S5	19:01:39	19:01:52	Insecta	Diptera					Other			18:01-24:00
29-7-2020	S5	20:16:24	20:16:35	Insecta						Other			18:01-24:00
29-7-2020	S5	20:27:43	20:27:56	Insecta						Fly by			18:01-24:00
29-7-2020	S5	09:11:34	09:11:46	Insecta	Diptera	Syrphidae				Fly by			06:01-12:00
29-7-2020	S5	09:19:57	09:20:08	Insecta	Diptera					Fly by			06:01-12:00
29-7-2020	S5	09:31:56	09:32:11	Insecta	Diptera	Syrphidae	Syrphinae			Hovered near flowers	P. dilatata		06:01-12:00
29-7-2020	S5	10:14:38	10:14:51	Insecta	Diptera	Syrphidae	Syrphinae			Hovered near flowers	P. dilatata		06:01-12:00
29-7-2020	S5	10:14:52	10:15:04	Insecta	Diptera	Syrphidae				Fly by			06:01-12:00
29-7-2020	S5	10:22:19	10:22:30	Insecta	Diptera					Fly by			06:01-12:00
29-7-2020	S5	10:40:04	10:40:17	Insecta	Diptera	Syrphidae				Fly by			06:01-12:00
29-7-2020	S5	10:54:14	10:54:28	Insecta						Other			06:01-12:00
29-7-2020	S5	10:55:16	10:55:31	Insecta						Other			06:01-12:00
29-7-2020	S5	10:56:00	10:56:12	Insecta						Other			06:01-12:00
29-7-2020	S5	10:58:50	10:59:01	Insecta						Other			06:01-12:00
29-7-2020	S5	10:59:37	10:59:53	Insecta						Other			06:01-12:00
29-7-2020	S5	12:08:21	12:08:33	Insecta	Diptera	Syrphidae				Fly by			12:01-18:00
29-7-2020	S5	12:41:18	12:41:38	Insecta	Diptera	Syrphidae				Fly by			12:01-18:00
29-7-2020	S5	14:31:04	14:31:18	Insecta	Diptera	Syrphidae				Landed on flower	P. dilatata		12:01-18:00
29-7-2020	S5	14:46:15	14:46:37	Insecta	Hymenoptera	Vespidae				Fly by			12:01-18:00
29-7-2020	S5	16:29:55	16:30:08	Insecta	Diptera	Syrphidae	Syrphinae			Hovered near flowers	P. dilatata		12:01-18:00
29-7-2020	S5	19:52:37	19:52:48	Insecta	Diptera					Fly by			18:01-24:00
30-7-2020	S5	15:29:35	15:29:56	Insecta	Hymenoptera	Apidae		Bombus	melanopygus	Active on flower	P. dilatata	N	12:01-18:00
30-7-2020	S5	11:25:48	11:25:59	Insecta	Hymenoptera	Apidae		Bombus		Fly by			06:01-12:00
30-7-2020	S5	11:37:02	11:37:17	Insecta	Hymenoptera	Apidae		Bombus		Active on flower	P. dilatata	N	06:01-12:00
30-7-2020	S5	11:37:27	11:37:39	Insecta	Hymenoptera	Apidae		Bombus		Fly by			06:01-12:00
30-7-2020	S5	11:45:36	11:45:48	Insecta	Hymenoptera	Apidae		Bombus		Landed on flower	P. dilatata		06:01-12:00
30-7-2020	S5	12:26:14	12:26:26	Insecta	Hymenoptera	Apidae		Bombus		Fly by			12:01-18:00
30-7-2020	S5	17:02:05	17:02:22	Insecta	Hymenoptera	Apidae		Bombus		Active on flower	P. dilatata	N	12:01-18:00
30-7-2020	S5	18:42:24	18:42:38	Insecta	Hymenoptera	Apidae		Bombus		Landed on flower	P. dilatata		18:01-24:00
30-7-2020	S5	19:44:23	19:44:41	Insecta	Diptera	Syrphidae		Chrysotoxum		Landed on flower	P. dilatata		18:01-24:00
30-7-2020	S5	07:39:36	07:39:47	Arachnida						Other			06:01-12:00
30-7-2020	S5	08:44:15	08:44:25	Insecta						Fly by			06:01-12:00
30-7-2020	S5	09:49:37	09:49:48	Insecta						Fly by			06:01-12:00
30-7-2020	S5	09:50:20	09:50:33	Insecta	Diptera	Syrphidae				Fly by			06:01-12:00
30-7-2020	S5	09:54:59	09:55:15	Insecta	Diptera	Syrphidae	Syrphinae			Hovered near flowers	P. dilatata		06:01-12:00
30-7-2020	S5	11:30:47	11:30:59	Insecta						Other			06:01-12:00
30-7-2020	S5	11:31:36	11:31:47	Insecta	Diptera	Syrphidae	Syrphinae			Landed on flower	P. dilatata		06:01-12:00
30-7-2020	S5	11:37:27	11:37:39	Insecta	Diptera	Syrphidae				Fly by			06:01-12:00
30-7-2020	S5	12:26:14	12:26:26	Insecta	Diptera	Syrphidae				Fly by			12:01-18:00
30-7-2020	S5	14:37:08	14:37:53	Insecta	Diptera	Syrphidae				Fly by			12:01-18:00
30-7-2020	S5	19:42:12	19:42:25	Insecta	Diptera	Syrphidae				Fly by			18:01-24:00
30-7-2020	S5	19:57:35	19:57:49	Insecta	Diptera	Syrphidae				Fly by			18:01-24:00
30-7-2020	S5	19:57:35	19:57:49	Insecta	Diptera					On flower	P. dilatata		18:01-24:00
30-7-2020	S5	20:00:42	20:00:53	Insecta	Diptera					Other			18:01-24:00
30-7-2020	S5	20:14:27	20:14:38	Insecta	Diptera					Fly by			18:01-24:00
31-7-2020	S5	14:33:32	14:34:17	Insecta	Hymenoptera	Apidae		Bombus	flavifrons	Active on flower	P. dilatata	Y	12:01-18:00
31-7-2020	S5	14:34:17	14:35:01	Insecta	Hymenoptera	Apidae		Bombus	flavifrons	Active on flower	P. dilatata	Y	12:01-18:00
31-7-2020	S5	14:35:03	14:35:17	Insecta	Hymenoptera	Apidae		Bombus	flavifrons	Active on flower	P. dilatata	N	12:01-18:00
31-7-2020	S5	15:01:46	15:02:00	Insecta	Hymenoptera	Apidae		Bombus	flavifrons	Landed on flower	P. dilatata		12:01-18:00
31-7-2020	S5	14:05:59	14:06:44	Insecta	Lepidoptera	Nymphalidae		Speyeria	hydaspe	Active on flower	P. dilatata	Y	12:01-18:00
31-7-2020	S5	14:06:37	14:07:22	Insecta	Lepidoptera	Nymphalidae		Speyeria	hydaspe	Active on flower	P. dilatata	Y	12:01-18:00
31-7-2020	S5	14:07:17	14:08:02	Insecta	Lepidoptera	Nymphalidae		Speyeria	hydaspe	Active on flower	P. dilatata	Y	12:01-18:00
31-7-2020	S5	14:07:59	14:08:44	Insecta	Lepidoptera	Nymphalidae		Speyeria	hydaspe	Active on flower	P. dilatata	Y	12:01-18:00
31-7-2020	S5	14:08:39	14:09:24	Insecta	Lepidoptera	Nymphalidae		Speyeria	hydaspe	Active on flower	P. dilatata	Y	12:01-18:00
31-7-2020	S5	14:09:19	14:10:04	Insecta	Lepidoptera	Nymphalidae		Speyeria	hydaspe	Active on flower	P. dilatata	Y	12:01-18:00
31-7-2020	S5	14:09:57	14:10:32	Insecta	Lepidoptera	Nymphalidae		Speyeria	hydaspe	Active on flower	P. dilatata	Y	12:01-18:00
31-7-2020	S5	14:17:52	14:18:37	Insecta	Lepidoptera	Nymphalidae		Speyeria	hydaspe	Active on flower	P. dilatata	Y	12:01-18:00
31-7-2020	S5	14:18:32	14:19:17	Insecta	Lepidoptera	Nymphalidae		Speyeria	hydaspe	Active on flower	P. dilatata	Y	12:01-18:00
31-7-2020	S5	14:19:12	14:19:57	Insecta	Lepidoptera	Nymphalidae		Speyeria	hydaspe	Active on flower	P. dilatata	Y	12:01-18:00
31-7-2020	S5	14:19:52	14:20:37	Insecta	Lepidoptera	Nymphalidae		Speyeria	hydaspe	Active on flower	P. dilatata	Y	12:01-18:00
31-7-2020	S5	14:20:32	14:21:17	Insecta	Lepidoptera	Nymphalidae		Speyeria	hydaspe	Active on flower	P. dilatata	Y	12:01-18:00
31-7-2020	S5	14:21:09	14:21:27	Insecta	Lepidoptera	Nymphalidae		Speyeria	hydaspe	Active on flower	P. dilatata	Y	12:01-18:00
31-7-2020	S5	14:23:12	14:23:57	Insecta	Lepidoptera	Nymphalidae		Speyeria	hydaspe	Active on flower	P. dilatata	Y	12:01-18:00
31-7-2020	S5	14:23:52	14:24:37	Insecta	Lepidoptera	Nymphalidae		Speyeria	hydaspe	Active on flower	P. dilatata	Y	12:01-18:00
31-7-2020	S5	14:24:32	14:25:17	Insecta	Lepidoptera	Nymphalidae		Speyeria	hydaspe	Active on flower	P. dilatata	Y	12:01-18:00
31-7-2020	S5	14:25:10	14:25:55	Insecta	Lepidoptera	Nymphalidae		Speyeria	hydaspe	Active on flower	P. dilatata	Y	12:01-18:00
31-7-2020	S5	14:25:47	14:26:32	Insecta	Lepidoptera	Nymphalidae		Speyeria	hydaspe	Active on flower	P. dilatata	Y	12:01-18:00
31-7-2020	S5	14:26:25	14:27:10	Insecta	Lepidoptera	Nymphalidae		Speyeria	hydaspe	Active on flower	P. dilatata	Y	12:01-18:00
31-7-2020	S5	14:27:05	14:27:39	Insecta	Lepidoptera	Nymphalidae		Speyeria	hydaspe	Active on flower	P. dilatata	Y	12:01-18:00
31-7-2020	S5	14:28:14	14:28:59	Insecta	Lepidoptera	Nymphalidae		Speyeria	hydaspe	Active on flower	P. dilatata	Y	12:01-18:00
31-7-2020	S5	14:28:54	14:29:39	Insecta	Lepidoptera	Nymphalidae		Speyeria	hydaspe	Active on flower	P. dilatata	Y	12:01-18:00
31-7-2020	S5	14:29:36	14:29:58	Insecta	Lepidoptera	Nymphalidae		Speyeria	hydaspe	Active on flower	P. dilatata	Y	12:01-18:00
31-7-2020	S5	14:30:00	14:30:45	Insecta	Lepidoptera	Nymphalidae		Speyeria	hydaspe	Active on flower	P. dilatata	Y	12:01-18:00
31-7-2020	S5	14:30:40	14:31:14	Insecta	Lepidoptera	Nymphalidae		Speyeria	hydaspe	Active on flower	P. dilatata	Y	12:01-18:00
31-7-2020	S5	08:44:14	08:44:29	Insecta	Hymenoptera	Apidae		Bombus	melanopygus	Active on flower	P. dilatata	N	06:01-12:00
31-7-2020	S5	14:03:46	14:03:57	Insecta	Hymenoptera	Apidae		Bombus	melanopygus	Active on flower	P. dilatata	N	12:01-18:00
31-7-2020	S5	14:04:11	14:04:56	Insecta	Hymenoptera	Apidae		Bombus	melanopygus	Active on flower	P. dilatata	N	12:01-18:00
31-7-2020	S5	14:04:51	14:05:26	Insecta	Hymenoptera	Apidae		Bombus	melanopygus	Active on flower	P. dilatata		12:01-18:00
31-7-2020	S5	14:57:57	14:58:08	Insecta	Hymenoptera	Apidae		Bombus	melanopygus	Landed on flower	P. dilatata		12:01-18:00
31-7-2020	S5	16:25:10	16:25:21	Insecta	Hymenoptera	Apidae		Bombus	melanopygus	Hovered near flowers	P. dilatata		12:01-18:00
31-7-2020	S5	16:05:01	16:05:25	Insecta	Hymenoptera	Apidae		Bombus	sitkensis	Active on flower	P. dilatata	N	12:01-18:00
31-7-2020	S5	07:57:30	07:57:41	Insecta	Hymenoptera	Apidae		Bombus		Fly by			06:01-12:00
31-7-2020	S5	08:19:33	08:19:45	Insecta	Hymenoptera	Apidae		Bombus		Hovered near flowers	P. dilatata		06:01-12:00
31-7-2020	S5	08:34:02	08:34:14	Insecta	Hymenoptera	Apidae		Bombus		Hovered near flowers	P. dilatata		06:01-12:00
31-7-2020	S5	12:54:02	12:54:22	Insecta	Hymenoptera	Apidae		Bombus		Active on flower	P. dilatata	N	12:01-18:00
31-7-2020	S5	12:54:51	12:55:04	Insecta	Hymenoptera	Apidae		Bombus		Hovered near flowers	P. dilatata		12:01-18:00
31-7-2020	S5	13:16:22	13:16:33	Insecta	Hymenoptera	Apidae		Bombus		Hovered near flowers	P. dilatata		12:01-18:00
31-7-2020	S5	17:32:50	17:33:03	Insecta	Hymenoptera	Apidae		Bombus		Hovered near flowers	P. dilatata		12:01-18:00
31-7-2020	S5	18:17:39	18:17:52	Insecta	Hymenoptera	Apidae		Bombus		Fly by			18:01-24:00
31-7-2020	S5	07:11:30	07:11:42	Insecta	Diptera	Syrphidae		Platycheirus		Landed on flower	P. dilatata		06:01-12:00
31-7-2020	S5	11:40:24	11:40:42	Insecta	Diptera	Syrphidae		Platycheirus		Landed on flower	P. dilatata		06:01-12:00
31-7-2020	S5	05:29:39	05:29:50	Insecta						Fly by			00:01-06:00
31-7-2020	S5	05:36:54	05:37:05	Insecta						Fly by			00:01-06:00
31-7-2020	S5	06:35:22	06:35:34	Insecta	Diptera	Syrphidae				Fly by			06:01-12:00
31-7-2020	S5	06:57:19	06:57:31	Insecta	Diptera	Syrphidae				Fly by			06:01-12:00
31-7-2020	S5	07:08:56	07:09:07	Insecta	Diptera	Syrphidae				Fly by			06:01-12:00
31-7-2020	S5	07:23:42	07:23:54	Insecta	Diptera	Syrphidae				Fly by			06:01-12:00
31-7-2020	S5	07:28:08	07:28:21	Insecta	Diptera	Syrphidae	Syrphinae			Hovered near flowers	P. dilatata		06:01-12:00
31-7-2020	S5	07:33:13	07:33:27	Insecta	Diptera	Syrphidae	Syrphinae			Hovered near flowers	P. dilatata		06:01-12:00
31-7-2020	S5	07:41:44	07:41:55	Insecta	Diptera					Fly by			06:01-12:00
31-7-2020	S5	07:42:38	07:42:50	Insecta	Diptera	Syrphidae				Fly by			06:01-12:00
31-7-2020	S5	07:43:26	07:43:38	Insecta	Diptera	Syrphidae				Fly by			06:01-12:00
31-7-2020	S5	07:57:20	07:57:32	Insecta	Diptera	Syrphidae	Syrphinae			Hovered near flowers	P. dilatata		06:01-12:00
31-7-2020	S5	08:02:19	08:02:30	Insecta	Diptera	Syrphidae				Fly by			06:01-12:00
31-7-2020	S5	08:07:27	08:07:40	Insecta	Diptera	Syrphidae				Fly by			06:01-12:00
31-7-2020	S5	08:23:05	08:23:27	Insecta						Fly by			06:01-12:00
31-7-2020	S5	08:28:50	08:29:08	Insecta						Fly by			06:01-12:00
31-7-2020	S5	08:34:34	08:34:44	Insecta	Diptera	Syrphidae	Syrphinae			Hovered near flowers	P. dilatata		06:01-12:00
31-7-2020	S5	08:39:00	08:39:13	Insecta						Fly by			06:01-12:00
31-7-2020	S5	08:39:15	08:39:25	Insecta						Fly by			06:01-12:00
31-7-2020	S5	09:01:33	09:01:46	Insecta						Other			06:01-12:00
31-7-2020	S5	09:03:08	09:03:20	Insecta	Diptera	Syrphidae				Fly by			06:01-12:00
31-7-2020	S5	09:06:34	09:06:46	Insecta	Diptera	Syrphidae				Fly by			06:01-12:00
31-7-2020	S5	09:23:30	09:23:44	Insecta	Diptera	Syrphidae	Syrphinae			Hovered near flowers	P. dilatata		06:01-12:00
31-7-2020	S5	09:23:49	09:23:59	Insecta	Diptera	Syrphidae	Syrphinae			Landed on flower	P. dilatata		06:01-12:00
31-7-2020	S5	09:25:02	09:25:17	Insecta	Diptera	Syrphidae	Syrphinae			On flower	P. dilatata		06:01-12:00
31-7-2020	S5	09:34:05	09:34:18	Insecta	Diptera	Syrphidae	Syrphinae			Hovered near flowers	P. dilatata		06:01-12:00
31-7-2020	S5	09:37:15	09:37:41	Insecta	Diptera	Syrphidae				Fly by			06:01-12:00
31-7-2020	S5	09:47:46	09:48:00	Insecta	Diptera	Syrphidae				Fly by			06:01-12:00
31-7-2020	S5	09:48:55	09:49:06	Insecta	Diptera	Syrphidae	Syrphinae			Hovered near flowers	P. dilatata		06:01-12:00
31-7-2020	S5	10:00:25	10:00:43	Insecta	Diptera	Syrphidae				Landed on plant	P. dilatata		06:01-12:00
31-7-2020	S5	10:32:05	10:32:15	Insecta	Diptera	Syrphidae				Fly by			06:01-12:00
31-7-2020	S5	10:40:29	10:40:42	Insecta	Diptera	Syrphidae	Syrphinae			Hovered near flowers	P. dilatata		06:01-12:00
31-7-2020	S5	10:54:48	10:55:03	Insecta	Diptera	Syrphidae	Syrphinae			Hovered near flowers	P. dilatata		06:01-12:00
31-7-2020	S5	11:01:44	11:01:55	Insecta	Diptera	Syrphidae				Fly by			06:01-12:00
31-7-2020	S5	11:02:59	11:03:11	Insecta	Diptera					Other			06:01-12:00
31-7-2020	S5	11:10:13	11:10:25	Insecta						Fly by			06:01-12:00
31-7-2020	S5	11:30:00	11:30:12	Insecta	Diptera	Syrphidae				Fly by			06:01-12:00
31-7-2020	S5	11:30:26	11:30:38	Insecta	Diptera					Hovered near flowers	P. dilatata		06:01-12:00
31-7-2020	S5	11:58:24	11:58:37	Insecta						Other			06:01-12:00
31-7-2020	S5	12:25:34	12:25:46	Insecta						Fly by			12:01-18:00
31-7-2020	S5	13:59:03	13:59:26	Insecta	Diptera	Syrphidae	Syrphinae			Landed on flower	P. dilatata	N	12:01-18:00
31-7-2020	S5	14:17:52	14:18:37	Arachnida						Other			12:01-18:00
31-7-2020	S5	14:18:32	14:19:17	Arachnida						Other			12:01-18:00
31-7-2020	S5	16:05:01	16:05:25	Insecta						Fly by			12:01-18:00
31-7-2020	S5	17:13:04	17:13:49	Insecta						Other			12:01-18:00
31-7-2020	S5	17:50:35	17:50:49	Insecta	Diptera	Syrphidae	Syrphinae			Hovered near flowers	P. dilatata		12:01-18:00
31-7-2020	S5	17:51:46	17:51:58	Insecta	Diptera	Syrphidae				Fly by			12:01-18:00
31-7-2020	S5	18:17:59	18:18:12	Insecta	Diptera	Tipulidae				Other			18:01-24:00
31-7-2020	S5	18:23:21	18:23:32	Insecta	Lepidoptera					Other			18:01-24:00
31-7-2020	S5	18:32:27	18:32:39	Insecta	Diptera	Syrphidae	Syrphinae			Hovered near flowers	P. dilatata		18:01-24:00
31-7-2020	S5	19:11:56	19:12:08	Insecta	Diptera					Landed on flower	P. dilatata		18:01-24:00
31-7-2020	S5	19:27:54	19:28:06	Insecta						Fly by			18:01-24:00
31-7-2020	S5	19:29:29	19:29:42	Insecta	Diptera	Syrphidae	Syrphinae			Hovered near flowers	P. dilatata		18:01-24:00
31-7-2020	S5	19:34:37	19:34:48	Insecta	Diptera	Syrphidae				Fly by			18:01-24:00
31-7-2020	S5	19:56:16	19:56:27	Insecta	Diptera					Fly by			18:01-24:00
1-8-2020	S6	16:18:59	16:19:12	Insecta	Diptera	Syrphidae		Dasysyrphus	intrudens (complex)	Landed on flower	P. dilatata		12:01-18:00
1-8-2020	S6	12:43:30	12:43:42	Insecta	Hymenoptera	Apidae		Bombus	melanopygus	On flower	P. dilatata	N	12:01-18:00
1-8-2020	S6	16:17:08	16:17:20	Insecta	Hymenoptera	Apidae		Bombus		Fly by			12:01-18:00
1-8-2020	S6	08:33:40	08:33:51	Insecta	Diptera	Syrphidae	Syrphinae			Hovered near flowers	P. dilatata		06:01-12:00
1-8-2020	S6	09:57:27	09:57:39	Insecta						Other			06:01-12:00
1-8-2020	S6	12:49:42	12:49:52	Insecta	Diptera	Syrphidae				Fly by			12:01-18:00
1-8-2020	S6	17:31:54	17:32:05	Insecta						Fly by			12:01-18:00
29-7-2020	S6	17:09:25	17:09:47	Insecta	Diptera	Syrphidae		Meliscaeva	cinctella	Landed on flower	P. dilatata		12:01-18:00
29-7-2020	S6	17:13:28	17:13:40	Insecta	Hymenoptera	Apidae		Bombus		Fly by			12:01-18:00
29-7-2020	S6	14:33:17	14:33:38	Insecta	Diptera					Other			12:01-18:00
29-7-2020	S6	15:06:49	15:07:00	Insecta	Hymenoptera	Formicidae				Other			12:01-18:00
29-7-2020	S6	15:07:49	15:08:01	Insecta	Diptera	Syrphidae				Fly by			12:01-18:00
29-7-2020	S6	15:34:21	15:34:36	Insecta	Diptera	Syrphidae	Syrphinae			Landed on flower	P. dilatata		12:01-18:00
29-7-2020	S6	17:26:15	17:26:26	Insecta						Fly by			12:01-18:00
29-7-2020	S6	17:56:41	17:56:53	Insecta						Fly by			12:01-18:00
29-7-2020	S6	18:08:33	18:08:44	Insecta	Diptera	Syrphidae				Fly by			18:01-24:00
29-7-2020	S6	18:26:50	18:27:04	Insecta	Diptera					Other			18:01-24:00
29-7-2020	S6	18:36:11	18:36:23	Insecta	Diptera					Other			18:01-24:00
29-7-2020	S6	18:47:08	18:47:21	Insecta	Diptera	Tipulidae				Other			18:01-24:00
29-7-2020	S6	18:48:13	18:48:33	Insecta	Diptera	Tipulidae				Other			18:01-24:00
29-7-2020	S6	18:51:15	18:51:33	Insecta	Diptera	Tipulidae				Other			18:01-24:00
29-7-2020	S6	19:22:12	19:22:30	Insecta	Diptera	Tipulidae				Fly by			18:01-24:00
29-7-2020	S6	20:00:52	20:01:04	Insecta	Diptera					On plant	P. dilatata		18:01-24:00
29-7-2020	S6	20:04:25	20:04:45	Insecta						Fly by			18:01-24:00
29-7-2020	S6	20:08:47	20:08:58	Insecta						Fly by			18:01-24:00
29-7-2020	S6	20:20:21	20:20:34	Insecta						Fly by			18:01-24:00
30-7-2020	S6	08:27:13	08:27:30	Insecta	Diptera	Syrphidae	Syrphinae			Hovered near flowers	P. dilatata		06:01-12:00
30-7-2020	S6	10:21:17	10:21:28	Insecta	Diptera	Syrphidae				Fly by			06:01-12:00
31-7-2020	S6	16:32:44	16:33:28	Insecta	Diptera	Syrphidae		Meliscaeva	cinctella	On flower	P. dilatata		12:01-18:00
31-7-2020	S6	16:33:30	16:33:46	Insecta	Diptera	Syrphidae		Meliscaeva	cinctella	Landed on flower	P. dilatata		12:01-18:00
31-7-2020	S6	12:53:13	12:53:25	Insecta	Hymenoptera	Apidae		Bombus	melanopygus	Landed on flower	P. dilatata		12:01-18:00
31-7-2020	S6	07:45:46	07:45:57	Insecta	Hymenoptera	Apidae		Bombus		Landed on flower	P. dilatata		06:01-12:00
31-7-2020	S6	14:10:28	14:11:13	Insecta	Lepidoptera	Geometridae		Rheumaptera		Active on flower	P. dilatata	N	12:01-18:00
31-7-2020	S6	14:13:03	14:13:33	Insecta	Lepidoptera	Geometridae		Rheumaptera		Active on flower	P. dilatata	N	12:01-18:00
31-7-2020	S6	14:14:21	14:14:32	Insecta	Lepidoptera	Geometridae		Rheumaptera		Active on flower	P. dilatata	N	12:01-18:00
31-7-2020	S6	14:14:33	14:14:48	Insecta	Lepidoptera	Geometridae		Rheumaptera		Active on flower	P. dilatata	N	12:01-18:00
31-7-2020	S6	14:15:01	14:15:15	Insecta	Lepidoptera	Geometridae		Rheumaptera		Active on flower	P. dilatata	N	12:01-18:00
31-7-2020	S6	14:15:24	14:15:59	Insecta	Lepidoptera	Geometridae		Rheumaptera		Active on flower	P. dilatata	N	12:01-18:00
31-7-2020	S6	14:15:59	14:16:44	Insecta	Lepidoptera	Geometridae		Rheumaptera		Active on flower	P. dilatata	N	12:01-18:00
31-7-2020	S6	14:16:39	14:17:22	Insecta	Lepidoptera	Geometridae		Rheumaptera		Active on flower	P. dilatata	N	12:01-18:00
31-7-2020	S6	14:17:22	14:17:40	Insecta	Lepidoptera	Geometridae		Rheumaptera		Active on flower	P. dilatata	N	12:01-18:00
31-7-2020	S6	14:17:40	14:18:09	Insecta	Lepidoptera	Geometridae		Rheumaptera		Active on flower	P. dilatata	N	12:01-18:00
31-7-2020	S6	14:18:15	14:18:59	Insecta	Lepidoptera	Geometridae		Rheumaptera		Active on flower	P. dilatata	N	12:01-18:00
31-7-2020	S6	14:18:53	14:19:15	Insecta	Lepidoptera	Geometridae		Rheumaptera		Active on flower	P. dilatata	N	12:01-18:00
31-7-2020	S6	14:19:15	14:19:29	Insecta	Lepidoptera	Geometridae		Rheumaptera		Active on flower	P. dilatata	N	12:01-18:00
31-7-2020	S6	14:19:30	14:19:42	Insecta	Lepidoptera	Geometridae		Rheumaptera		Active on flower	P. dilatata	N	12:01-18:00
31-7-2020	S6	06:29:16	06:29:27	Insecta	Diptera					Fly by			06:01-12:00
31-7-2020	S6	06:33:57	06:34:10	Insecta	Diptera					Landed on flower	P. dilatata		06:01-12:00
31-7-2020	S6	07:00:00	07:00:12	Insecta	Diptera					Hovered near flowers	P. dilatata		06:01-12:00
31-7-2020	S6	09:36:04	09:36:16	Insecta	Diptera	Syrphidae	Syrphinae			Hovered near flowers	P. dilatata		06:01-12:00
31-7-2020	S6	10:08:34	10:08:47	Insecta	Diptera					Other			06:01-12:00
31-7-2020	S6	10:09:07	10:09:25	Insecta	Diptera					Other			06:01-12:00
31-7-2020	S6	10:42:44	10:42:56	Insecta	Diptera	Syrphidae	Syrphinae			Landed on flower	P. dilatata		06:01-12:00
31-7-2020	S6	11:14:32	11:14:50	Insecta	Hymenoptera	Formicidae				Other			06:01-12:00
31-7-2020	S6	11:19:34	11:19:49	Insecta	Diptera	Syrphidae	Syrphinae			On flower	P. dilatata		06:01-12:00
31-7-2020	S6	11:19:56	11:20:09	Insecta	Diptera	Syrphidae	Syrphinae			Landed on flower	P. dilatata		06:01-12:00
31-7-2020	S6	12:16:05	12:16:16	Arachnida						Other			12:01-18:00
31-7-2020	S6	12:39:10	12:39:23	Insecta	Diptera	Syrphidae	Syrphinae			Hovered near flowers	P. dilatata		12:01-18:00
31-7-2020	S6	13:48:52	13:49:12	Insecta	Diptera	Syrphidae	Syrphinae			Landed on flower	P. dilatata		12:01-18:00
31-7-2020	S6	13:54:07	13:54:17	Arachnida						Other			12:01-18:00
31-7-2020	S6	13:54:53	13:55:04	Arachnida						Other			12:01-18:00
31-7-2020	S6	13:55:39	13:55:50	Arachnida						Other			12:01-18:00
31-7-2020	S6	13:55:51	13:56:00	Arachnida						Other			12:01-18:00
31-7-2020	S6	15:51:13	15:51:25	Insecta	Hymenoptera	Formicidae				Other			12:01-18:00
31-7-2020	S6	15:59:44	15:59:56	Insecta	Diptera	Syrphidae	Syrphinae			Landed on flower	P. dilatata		12:01-18:00
31-7-2020	S6	16:21:22	16:21:34	Insecta	Diptera					Other			12:01-18:00
31-7-2020	S6	16:29:21	16:29:34	Insecta	Hymenoptera	Formicidae				Other			12:01-18:00
31-7-2020	S6	17:21:41	17:21:52	Insecta	Diptera	Syrphidae	Syrphinae			Hovered near flowers	P. dilatata		12:01-18:00
31-7-2020	S6	17:46:00	17:46:13	Insecta						Other			12:01-18:00
31-7-2020	S6	19:00:02	19:00:15	Insecta						Other			18:01-24:00
31-7-2020	S6	19:01:52	19:02:20	Insecta						Other			18:01-24:00
31-7-2020	S6	19:35:50	19:36:02	Insecta						Fly by			18:01-24:00
31-7-2020	S6	19:43:50	19:44:02	Insecta						Fly by			18:01-24:00
31-7-2020	S6	20:11:15	20:11:26	Insecta						Fly by			18:01-24:00
31-7-2020	S6	20:13:11	20:13:23	Insecta	Diptera					Fly by			18:01-24:00
31-7-2020	S6	20:21:53	20:22:05	Insecta						Fly by			18:01-24:00

## Sheet: Pollinia data
ID-site-plant	Stain colour	Species	Start date	Location	City	Province	Latitude	Longitude	Altitude(m)	#flowers stained	#pollinia stained	Notes		DAY 1	date	#flowers pollen removed	#pollinia removed	#selfed - stain fl with stain poll.	#selfed - unstain fl. On stain pl. with stain poll.	#outcross/self - the stain plant with unstained pollen	#outcross - neighbour unstain pl with stain pollen	distance m	% P removed	% selfed	% outcross	Notes		DAY 2	date	#flowers pollen removed	#pollinia removed	#selfed stain fl with stain poll.	#selfed - unstain fl. On stain pl. with stain poll.	#outcross/self - the stain plant with unstained pollen	#outcross - neighbour unstain pl with stain pollen	distance m	% P removed	% selfed	% outcross	Notes		DAY 3	date	#flowers pollen removed	#pollinia removed	#selfed stain fl with stain poll.	#selfed - unstain fl. On stain pl. with stain poll.	#outcross/self - the stain plant with unstained pollen	#outcross - neighbour unstain pl with stain pollen
AV-S1-1	blue	Platnathera dilatata var. dilatata	2020-07-26	Alpine village Mt Washington	Comox	BC	49.7389	-125.304	1165	10	20			DAY 1	2020-07-27	2	2	0	0	0	0		10	0	0	rain		DAY 2	2020-07-28	0	0	0	0	0	0		0	0	0			DAY 3	2020-07-29	1	1	0	0	0	0
AV-S1-2	red	Platnathera dilatata var. dilatata	2020-07-26	Alpine village Mt Washington	Comox	BC	49.7389	-125.304	1165	10	20			DAY 1	2020-07-27	0	0	0	0	0	0		0	0	0	rain		DAY 2	2020-07-28	0	0	0	0	0	0		0	0	0			DAY 3	2020-07-29	2	3	0	0	0	0
AV-S1-3	orange	Platnathera dilatata var. dilatata	2020-07-26	Alpine village Mt Washington	Comox	BC	49.7389	-125.304	1165	10	20			DAY 1	2020-07-27	0	0	0	0	0	0		0	0	0	rain		DAY 2	2020-07-28	0	0	0	0	0	0		0	0	0			DAY 3	2020-07-29	0	0	0	0	0	0
AV-S1-4	pink	Platnathera dilatata var. dilatata	2020-07-26	Alpine village Mt Washington	Comox	BC	49.7389	-125.304	1165	10	20			DAY 1	2020-07-27	1	2	0	0	0	0		10	0	0	rain		DAY 2	2020-07-28	0	0	0	0	0	0		0	0	0			DAY 3	2020-07-29	4	7	0	0	0	0
AV-S1-5	purple	Platnathera dilatata var. dilatata	2020-07-26	Alpine village Mt Washington	Comox	BC	49.7389	-125.304	1165	10	20			DAY 1	2020-07-27	1	2	0	0	0	0		10	0	0	rain		DAY 2	2020-07-28	0	0	0	0	0	0		0	0	0			DAY 3	2020-07-29	7	11	0	0	0	0
AV-S1-6	green	Platnathera dilatata var. dilatata	2020-07-26	Alpine village Mt Washington	Comox	BC	49.7389	-125.304	1165	10	20			DAY 1	2020-07-27	0	0	0	0	0	0		0	0	0	rain		DAY 2	2020-07-28	0	0	0	0	0	0		0	0	0			DAY 3	2020-07-29	4	7	0	0	0	0
WW-S2-1	blue	Platnathera dilatata var. dilatata	2020-07-30	Washington Way	Comox	BC	49.7381	-125.304	1167	10	20			DAY 1	2020-07-31	2	3	0	0	0	1	2.5	15	0	5			DAY 2	2020-08-01	1	1	0	0	0	0		5	0	0			DAY 3	2020-08-02	1	2	0	0	1	0
WW-S2-2	red	Platnathera dilatata var. dilatata	2020-07-30	Washington Way	Comox	BC	49.7381	-125.304	1167	10	20			DAY 1	2020-07-31	2	4	0	0	0	1	1	20	0	5			DAY 2	2020-08-01	0	0	0	0	0	0		0	0	0			DAY 3	2020-08-02	1	1	1	0	0	0
WW-S2-3	orange	Platnathera dilatata var. dilatata	2020-07-30	Washington Way	Comox	BC	49.7381	-125.304	1167	10	20			DAY 1	2020-07-31	1	2	0	0	1	0		10	0	0			DAY 2	2020-08-01	0	0	0	0	0	0		0	0	0			DAY 3	2020-08-02	1	1	1	0	0	0
WW-S2-4	pink	Platnathera dilatata var. dilatata	2020-07-30	Washington Way	Comox	BC	49.7381	-125.304	1167	10	20			DAY 1	2020-07-31	2	4	0	0	1	0		20	0	0			DAY 2	2020-08-01	1	2	1	0	0	0		10	5	0			DAY 3	2020-08-02	1	1	0	1	0	0
WW-S2-5	purple	Platnathera dilatata var. dilatata	2020-07-30	Washington Way	Comox	BC	49.7381	-125.304	1167	10	20			DAY 1	2020-07-31	3	5	0	1	1	3	2x1, 1x0.5	25	5	15			DAY 2	2020-08-01	0	0	0	0	0	0		0	0	0			DAY 3	2020-08-02	2	3	0	0	0	0
WW-S2-6	green	Platnathera dilatata var. dilatata	2020-07-30	Washington Way	Comox	BC	49.7381	-125.304	1167	10	20			DAY 1	2020-07-31	1	2	0	0	1	0		10	0	0			DAY 2	2020-08-01	0	0	0	0	0	0		0	0	0			DAY 3	2020-08-02	2	3	0	0	1	0
VR-S3-1	blue	Platnathera dilatata var. dilatata	2020-07-30	Village Run	Comox	BC	49.7396	-125.304	1153	10	20			DAY 1	2020-07-31	2	3	0	1	0	0		15	5	0			DAY 2	2020-08-01	0	0	0	0	0	0		0	0	0			DAY 3	2020-08-02	3	6	0	0	0	0
VR-S3-2	red	Platnathera dilatata var. dilatata	2020-07-30	Village Run	Comox	BC	49.7396	-125.304	1153	10	20			DAY 1	2020-07-31	1	1	0	0	4	1	0.75	5	0	5			DAY 2	2020-08-01	0	0	0	0	0	0		0	0	0			DAY 3	2020-08-02	1	1	0	0	0	0
VR-S3-3	orange	Platnathera dilatata var. dilatata	2020-07-30	Village Run	Comox	BC	49.7396	-125.304	1153	10	20			DAY 1	2020-07-31	0	0	0	0	0	0		0	0	0			DAY 2	2020-08-01	2	3	0	1	0	1	0.5	15	5	5			DAY 3	2020-08-02	1	1	0	0	0	0
VR-S3-4	pink	Platnathera dilatata var. dilatata	2020-07-30	Village Run	Comox	BC	49.7396	-125.304	1153	10	20			DAY 1	2020-07-31	2	3	0	2	0	0		15	10	0			DAY 2	2020-08-01	0	0	0	0	0	0		0	0	0			DAY 3	2020-08-02	2	3	0	0	0	0
VR-S3-5	purple	Platnathera dilatata var. dilatata	2020-07-30	Village Run	Comox	BC	49.7396	-125.304	1153	10	20			DAY 1	2020-07-31	1	2	0	0	3	0		10	0	0			DAY 2	2020-08-01	1	2	0	0	0	0		10	0	0			DAY 3	2020-08-02	3	5	0	0	2	0
VR-S3-6	green	Platnathera dilatata var. dilatata	2020-07-30	Village Run	Comox	BC	49.7396	-125.304	1153	10	20			DAY 1	2020-07-31	3	4	0	0	0	0		20	0	0			DAY 2	2020-08-01	0	0	0	0	0	0		0	0	0			DAY 3	2020-08-02	0	0	0	0	0	0
AR1-S4-1	blue	Platnathera dilatata var. dilatata	2020-08-05	Alpine Resort 1	Comox	BC	49.7404	-125.301	1172	4	8			DAY 1	2020-08-06	1	2	0	0	0	0		25	0	0			DAY 2	2020-08-07	0	0	0	0	0	0		0	0	0	rain		DAY 3	2020-08-08	0	0	0	0	0	0
AR1-S4-2	red	Platnathera dilatata var. dilatata	2020-08-05	Alpine Resort 1	Comox	BC	49.7404	-125.301	1172	10	20			DAY 1	2020-08-06	1	2	0	0	0	0		10	0	0			DAY 2	2020-08-07	0	0	0	0	0	0		0	0	0	rain		DAY 3	2020-08-08	1	2	1	1	2	0
AR1-S4-3	orange	Platnathera dilatata var. dilatata	2020-08-05	Alpine Resort 1	Comox	BC	49.7404	-125.301	1172	10	20			DAY 1	2020-08-06	0	0	0	0	0	0		0	0	0			DAY 2	2020-08-07	0	0	0	0	0	0		0	0	0	rain		DAY 3	2020-08-08	1	2	0	0	0	1
AR1-S4-4	pink	Platnathera dilatata var. dilatata	2020-08-05	Alpine Resort 1	Comox	BC	49.7404	-125.301	1172	8	16			DAY 1	2020-08-06	0	0	0	0	0	0		0	0	0			DAY 2	2020-08-07	0	0	0	0	0	0		0	0	0	rain		DAY 3	2020-08-08	0	0	0	0	0	0
AR1-S4-5	purple	Platnathera dilatata var. dilatata	2020-08-05	Alpine Resort 1	Comox	BC	49.7404	-125.301	1172	10	20			DAY 1	2020-08-06	1	1	1	0	0	0		5	5	0			DAY 2	2020-08-07	0	0	0	0	0	0		0	0	0	rain		DAY 3	2020-08-08	0	0	0	0	1	0
AR1-S4-6	green	Platnathera dilatata var. dilatata	2020-08-05	Alpine Resort 1	Comox	BC	49.7404	-125.301	1172	10	20			DAY 1	2020-08-06	2	3	0	0	0	0		15	0	0			DAY 2	2020-08-07	0	0	0	0	0	0		0	0	0	rain		DAY 3	2020-08-08	0	0	0	0	4	0
AR2-S5-1	blue	Platnathera dilatata var. dilatata	2020-08-05	Alpine Resort 2	Comox	BC	49.7401	-125.299	1172	10	20			DAY 1	2020-08-06	1	1	0	0	0	0		5	0	0			DAY 2	2020-08-07	0	0	0	0	0	0		0	0	0	rain		DAY 3	2020-08-08	2	4	0	1	0	2
AR2-S5-2	red	Platnathera dilatata var. dilatata	2020-08-05	Alpine Resort 2	Comox	BC	49.7401	-125.299	1172	10	20			DAY 1	2020-08-06	0	0	0	0	0	0		0	0	0			DAY 2	2020-08-07	0	0	0	0	0	0		0	0	0	rain		DAY 3	2020-08-08	0	0	0	0	0	0
AR2-S5-3	orange	Platnathera dilatata var. dilatata	2020-08-05	Alpine Resort 2	Comox	BC	49.7401	-125.299	1172	10	20			DAY 1	2020-08-06	0	0	0	0	0	0		0	0	0			DAY 2	2020-08-07	0	0	0	0	0	0		0	0	0	rain		DAY 3	2020-08-08	0	0	0	0	0	0
AR2-S5-4	pink	Platnathera dilatata var. dilatata	2020-08-05	Alpine Resort 2	Comox	BC	49.7401	-125.299	1172	10	20			DAY 1	2020-08-06	1	1	0	0	0	1	0.15	5	0	5			DAY 2	2020-08-07	0	0	0	0	0	0		0	0	0	rain		DAY 3	2020-08-08	1	2	1	0	0	0
AR2-S5-5	purple	Platnathera dilatata var. dilatata	2020-08-05	Alpine Resort 2	Comox	BC	49.7401	-125.299	1172	10	20			DAY 1	2020-08-06	0	0	0	0	0	0		0	0	0			DAY 2	2020-08-07	0	0	0	0	0	0		0	0	0	rain		DAY 3	2020-08-08	0	0	0	0	0	0
AR2-S5-6	green	Platnathera dilatata var. dilatata	2020-08-05	Alpine Resort 2	Comox	BC	49.7401	-125.299	1172	10	20			DAY 1	2020-08-06	2	2	0	0	0	0		10	0	0			DAY 2	2020-08-07	0	0	0	0	0	0		0	0	0	rain		DAY 3	2020-08-08	1	2	0	1	2	0
[truncated: 5 more columns]
